1 **Gram-positive bacteria secrete RNA aptamers to activate human STING for IL-1 $\beta$**   
2 **release.**

3  
4 **Author List**

5 Shivalee N. Duduskar<sup>1</sup>, Mohamed Ghait<sup>1</sup>, Martin Westermann<sup>2</sup>, Huijuan Guo<sup>3</sup>, Anuradha  
6 Ramoji<sup>1,4,5</sup>, Christoph Sponholz<sup>6</sup>, Bianca Göhrig<sup>1</sup>, Tony Bruns<sup>1,7,8</sup>, Ute Neugebauer<sup>1,4</sup>,  
7 Jurgen Popp<sup>4,5</sup>, Lorena P N Tuchscher<sup>1,9</sup>, Bettina Löffler<sup>1,9</sup>, Nico Ueberschaar<sup>10</sup>, Christine  
8 Beemelmans<sup>3</sup>, Mervyn Singer<sup>11</sup>, Michael Bauer<sup>1,4</sup> and Sachin D. Deshmukh<sup>1,\*</sup>

9 <sup>1</sup>Integrated Research and Treatment Center, Center for Sepsis Control and Care, Jena  
10 University Hospital, Jena, Germany

11 <sup>2</sup>Centre of Electron Microscopy, Jena University Hospital, Jena, Germany

12 <sup>3</sup>Leibniz Institute for Natural Product Research and Infection Biology e.V., Jena, Germany

13 <sup>4</sup>Leibniz Institute of Photonic Technology, Jena- member of the research alliance “Leibniz  
14 Health Technologies” Jena, Germany

15 <sup>5</sup>Institute of Physical Chemistry and Abbe Center of Photonics, Friedrich Schiller  
16 University Jena, Jena, Germany

17 <sup>6</sup>Department for Anesthesiology & Intensive Care Medicine, Jena University Hospital,  
18 Jena, Germany

19 <sup>7</sup>Department of Internal Medicine IV (Gastroenterology, Hepatology, and Infectious  
20 Diseases), Jena University Hospital, Jena, Germany

21 <sup>8</sup>Department of Internal Medicine III, University Hospital RWTH Aachen, Aachen,  
22 Germany

23 <sup>9</sup>Institute of Medical Microbiology, Jena University Hospital, Jena, Germany

24 <sup>10</sup>Mass Spectrometry Platform, Friedrich Schiller University Jena, Faculty of Chemistry  
25 and Earth Sciences, 07743 Jena, Germany

26 <sup>11</sup>Bloomsbury Institute of Intensive Care Medicine, University College London, London,  
27 United Kingdom

28 \*To whom correspondence should be addressed E-mail: sachin.deshmukh@med.uni-  
29 jena.de

30 **ABSTRACT**

31 Molecular mechanisms through which Gram-positive bacteria induce the canonical  
32 inflammasome are poorly understood. Here, we studied the effects of Group B streptococci  
33 (GBS) and *Staphylococcus aureus* (SA) on inflammasome activation in human macrophages.  
34 Dinucleotide binding small RNA aptamers released by SA and GBS were shown to trigger  
35 increased IL-1 $\beta$  generation by inflammasomes. The stimulator of interferon genes-STING as  
36 a central mediator of innate immune responses has been identified as the key target of  
37 pathogenic RNA. Multi-lamellar lipid bodies (MLBs) produced by SA function as vehicles  
38 for the RNA aptamers. Notably, expression of RNA aptamers is controlled by an accessory  
39 gene regulator quorum sensing system of the bacteria. These findings have been translated to  
40 patients with Gram-positive sepsis showing hallmarks of MLB-RNA-mediated inflammasome  
41 activation. Together our findings may provide a new perspective for the pathogenicity of  
42 Gram-positive bacterial infection in man.

## 43 INTRODUCTION

44 Antimicrobial activity triggered by exposure to microbes follows activation of germ line-  
45 encoded pattern recognition receptors (PRRs) upon detection of pathogen-associated  
46 molecular patterns (PAMPs) or self-encoded damage-associated molecular patterns (DAMPs)  
47 (1). Inflammasomes are multimeric complexes assembled by PRRs in the cytosol of host cells  
48 (2). NLRP3 is the best characterized inflammasome; it consists of three major components: a  
49 cytoplasmic sensor NLRP3, an adaptor ASC (apoptosis-associated speck-like protein with  
50 CARD domain), and an interleukin-1 $\beta$  converting enzyme pro-caspase-1 (3). NLRP3 and  
51 ASC together promote activation and cleavage of pro-caspase-1 which subsequently cleaves  
52 and matures pro-IL-1 $\beta$  and pro-IL-18 (3, 4). Microbial ligands such as lipopolysaccharide  
53 (LPS) and nucleic acids are potent activators of PRRs at both the cell surface and within the  
54 cytosol of macrophages and dendritic cells (4). Much progress has been made in  
55 understanding how DNA and RNA trigger host pro-inflammatory immune responses.  
56 However, how these nucleic acids (in particular RNA) are sensed and thus activate the  
57 inflammasome remains unclear.

58 The endoplasmic reticulum (ER) resident transmembrane protein, stimulator of interferon  
59 genes (STING) plays a crucial role in the innate immune response against pathogen infections  
60 (5). On recognition of the cytosolic DNA, cyclic GMP-AMP synthase (cGAS) catalyses the  
61 synthesis of cGAMP which, in turn, binds to and activates STING (6). Activated STING exits  
62 the ER to the Golgi apparatus, activating TBK1 which uses STING as a scaffold to  
63 phosphorylate and activate the transcriptional factor IRF3. Upon activation STING trans-  
64 locates to the lysosome, resulting in a drop of cytoplasmic K<sup>+</sup> due to lysosomal-mediated cell  
65 death. This subsequent fall in cytoplasmic K<sup>+</sup> triggers the NLRP3 inflammasome, activating  
66 caspase-1 to release IL-1 $\beta$  (7, 8). A recent study reported that inflammasome activation in  
67 human cells is initiated by STING upstream of NLRP3 (9). STING-dependent interferon  
68 responses are induced by bacteria derived second messenger, cyclic dinucleotides (CDN)  
69 (10), bacterially derived second messenger molecules (11, 12). CDN are delivered into the  
70 cytosol by bacterial pathogens (13, 14) that bind to STING (15) for release of interferons. The  
71 existence of CdnP enzyme anchored in extracellular cell wall was recently shown to have  
72 phosphodiesterase activity towards cyclic-di-AMP in GBS. In the absence of CdnP the host  
73 overproduced type-I IFN leading to bacterial clearance (16). Bacterial CDN bind and activate  
74 STING for interferon responses, but it remains unclear how STING could still initiate NLRP3  
75 responses for IL-1 $\beta$  release.

76 *S. aureus* and Group-B streptococci (GBS) are the most common opportunistic bacteria  
77 causing adult and neonatal sepsis, respectively (17, 18). The presence of pathogenicity-related  
78 genes including protein toxins and bacterial RNA are involved in induction of IL-1 $\beta$  following  
79 infection by Gram-positive bacteria (19, 20). Over 90% of clinical isolates of *S. aureus*  
80 produce the golden carotenoid pigment, staphyloxanthin. Production of staphyloxanthin is key  
81 to *S. aureus* virulence; bacteria lacking the capacity for staphyloxanthin synthesis are non-  
82 pathogenic and fail to induce host cell death (21, 22, 23). Similar observations were made for  
83 granadaene, a structurally bio-similar lipid toxin present in many clinical isolates of GBS  
84 causing sepsis and endocarditis. Notably, strains lacking granadaene are incapable of inducing  
85 cell death and translocation across the placenta; nevertheless stabilization of lipids was  
86 necessary for granadaene (24). Expression of numerous virulence factors is necessary for  
87 infections caused by *S. aureus* with the coordinated action of several regulators including two  
88 component systems: transcriptional regulatory proteins and regulatory RNAs (25). These  
89 regulatory networks are controlled by multiple trans-acting modulators including proteins,  
90 secondary metabolites, small peptides and RNAs. The ability of RNA to regulate these  
91 virulence factors in *S. aureus* has been widely studied (26). The 5' untranslated regions of  
92 mRNA and small non-coding RNA are the known RNA-based regulators within *S. aureus*  
93 (27). Small trans-acting non-coding RNAs, referred to as small RNAs (sRNAs), play a key  
94 role in RNA-dependent regulation that enables *S. aureus* to express virulence genes during  
95 infection (27). How small RNAs are involved in inflammasome activation for release of IL-1 $\beta$   
96 has yet to be studied.

97 Moreover, bacterial RNA is also a potent activator of cytokines and can induce the cytosolic  
98 inflammasome through the NLRP3 scaffold secreting IL-1 $\beta$  (20, 28, 29). Immune activating  
99 bacterial RNA contains mRNA, tRNA and three different sizes of rRNA (23s, 16s and 5s).  
100 Only mRNA is sensed by murine bone marrow-derived macrophages (BMDMs) while all  
101 other types are sensed by human macrophages (30). Different structural moieties of bacterial  
102 RNA (including  $\mu$ RNA) can induce the inflammasome via caspase-1 (30, 31). The RNA  
103 binding to small molecule ligands are cis-regulatory RNAs commonly found in the 5'  
104 untranslated region of mRNA (33). How RNA, in combination with CDN, activates the  
105 inflammasome has not yet been studied.

106 How the two major components, namely, lipid toxins and RNA, activate the inflammasome in  
107 bacterial infections to release IL-1 $\beta$  is not well understood. Moreover, how PAMPs get  
108 delivered to cytosolic receptors is unknown for Gram-positive bacteria. One such delivery

109 system involving outer membrane extracellular vesicles (OMV) from Gram-negative bacteria  
110 can activate the non-canonical inflammasome (32, 34). Release of extracellular vesicles (EVs)  
111 from Gram-positive bacteria has been previously reported (35) yet their exact molecular  
112 structure and role in pathogenicity, including inflammasome activation remain poorly  
113 understood.

114 In this current study, we sought to explore how Gram-positive bacteria deliver RNA to  
115 activate cytosolic inflammasome in human macrophages. We have structurally characterized  
116 Gram-positive bacterial vesicles (multi lamellar lipid bodies MLBs) which show alternatively  
117 structured lipid assemblies. MLBs enriched in RNA aptamers activate the canonical  
118 inflammasome pathway via STING for release of IL-1 $\beta$ . In SA, expression of MLB specific  
119  $\mu$ RNA aptamers is controlled by an accessory gene regulator quorum sensing system. We also  
120 characterized the functional role of the staphyloxanthin type of lipids in delivery of PAMPs to  
121 cytosolic inflammasome receptors. Taken together, this study highlights the importance of  
122 STING-specific CDN binding to RNA aptamer delivered by Gram-positive bacteria to  
123 activate the inflammasome in relevance to human sepsis.

## 124 RESULTS

### 125 *S. aureus* and GBS induces the canonical inflammasome via STING and bacterial RNA

126 Highly pathogenic bacteria such as *S. aureus* and GBS evoke a pronounced NLRP3-ASC-  
127 caspase-1 dependent inflammasome activation in macrophages; however, this only occurs  
128 upon infection with live but not heat-killed bacteria (38). Varied stimuli including microbial  
129 products such as muramyl dipeptide, pore-forming toxins, and bacterial and viral RNA can  
130 activate the NLRP3 inflammasome (39). Nucleic acids within the cytoplasm can activate the  
131 cGAS-STING pathway leading to induction of interferon (IFN) and anti-viral immunity (5,  
132 6). Considering the importance of IFN production via the cGAS-STING pathway, we  
133 investigated production of caspase-1 dependent cytokines through STING.

134 Human primary blood-derived macrophages and differentiated THP1 macrophage cells which  
135 activate both canonical and non-canonical inflammasome pathways (37) were used to  
136 examine activation by Gram-positive bacteria. Comparison was made against a genetically  
137 deleted panel of known signalling molecules within THP1 macrophages. Consistent with  
138 previous literature on non-canonical inflammasome activation by cytoplasmic LPS, we found  
139 that cell death was caspase-4 dependent but caspase-1 independent (**Supplemental Fig. 1A,**  
140 **1B**). On the other hand, nigericin, a potent inducer of the canonical inflammasome (38) was  
141 caspase-1 dependent but caspase-4 independent (**Supplemental Fig. 1C**). This underlines the  
142 usability of our CRISPR cell lines.

143 Of note, subsequent experiments with SA and GBS infections led to classical NLRP3  
144 inflammasome activation. The release of mature IL-1 $\beta$  was solely dependent on caspase-1  
145 through an adaptor ASC, but independent of caspase-4 (**Fig. 1A, 1B**). Moreover, activation of  
146 caspase-1 was independent of cGAS but STING dependent (**Fig. 1C, 1D**). STING deficient  
147 macrophages infected with GBS and SA showed reduction in IL-1 $\beta$  secretion and caspase-1  
148 activation when compared with cGAS deficient and wild type macrophages (**Fig. 1E**). The  
149 effect of STING deficiency was retrieved by transgenic expression of a wild type variant of  
150 STING<sup>R232</sup> (**Fig. 1F**). On the other hand, inflammasome-independent cytokines such as TNF-  
151  $\alpha$  showed no differences in the absence of either STING or cGAS (**Supplemental Fig. 1D**).  
152 Taking these results further we utilized a recently discovered, highly potent and selective  
153 small molecule antagonist (H-151) of STING protein (40). IL-1 $\beta$  production in human  
154 primary blood derived macrophages was abrogated by 80% following infection with GBS and  
155 *S. aureus* when pre-treated with H-151 (**Fig. 1G, 1H**). In contrast to this IL-1 $\beta$  response, H-  
156 151 pre-treatment had no effect on TNF- $\alpha$  production (**Supplemental Fig. 1E, 1F**). These

157 inflammasome activation findings contrast with previous findings for interferon production  
158 following bacterial infection that often requires both cGAS and STING (6, 16). As the  
159 significance of cGAS-STING in interferon production is well established, we queried which  
160 stimuli produced by Gram-positive bacteria could activate STING in the process of IL-1 $\beta$   
161 production. As anticipated, cytosolic RNA stimulation resulted in strong caspase-1  
162 inflammasome activation with release of IL-1 $\beta$  (**Fig. 1I**). To confirm that RNA can act as a  
163 potent activator of the canonical inflammasome pathway and IL-1 $\beta$  release, cells were treated  
164 with RNase A and then infected with SA. Consistent with prior literature (20), RNase A  
165 treated cells showed significantly reduced IL-1 $\beta$  secretion (**Fig. 1J**). Cells treated with DNase  
166 I and heat inactivated RNase A were used as controls and these were unable to show  
167 differences in IL-1 $\beta$  secretion (**Fig. 1K, 1L**). The above results generate a new paradigm  
168 where by Gram-positive bacterial RNA can activate the canonical inflammasome via STING.

#### 169 ***S. aureus* and GBS secrete multi-lamellar lipid bodies (MLBs) that contain** 170 **staphyloxanthin type of lipids and RNA**

171 *S. aureus* and GBS mainly follow an extracellular or phagosomal lifestyle. However,  
172 activation of STING and NLRP3 by bacterial RNA requires cytoplasmic delivery of PAMPs.  
173 Extracellular vesicles (EV) such as outer membrane vesicles from Gram-negative bacteria  
174 deliver LPS into the cytosol (34, 41). Heterogeneous EV-like structures have been observed in  
175 Gram-positive bacteria; these have been reported as membrane vesicles (MVs) but their  
176 formation and ultrastructure remain unknown (42). Hence, we sought to isolate and  
177 characterize these membrane vesicles from Gram-positive bacteria and determine their ability  
178 to induce the STING-dependent canonical inflammasome. We found that *S. aureus* and GBS  
179 showed multiple lobular protrusions 50-100 nm in size through the cell wall when subjected  
180 to scanning electron microscopy (SEM) (**Fig. 2A, 2B**). Occasionally, these structures were  
181 seen to form assemblies of several 100 nm sizes, filling the intracellular space (**Fig. 2C**).

182 To explore the formation of these vesicles further we subjected *S. aureus* and GBS to freeze-  
183 fracture electron microscopy (FEM). Similar to SEM, FEM revealed accumulated  
184 membranous structures both inside and outside the bacterial cell wall (**Fig. 2D, 2E**). Negative-  
185 staining TEM of vesicles isolated from GBS and *S. aureus* showed multiple membrane  
186 vesicle (MV)-like structures of 50 nm size. Upon closer inspection, some of these structures  
187 revealed to 100-400 nm size multi-lobular assemblies. We fractionated and purified both these  
188 structures and, on electron microscopy, noted 50 nm uni-lamellar MVs which were abundant  
189 in lower density fractions (**Fig. 2F**) whereas several 100 nm lipid-rich multi lamellar

190 structures were abundant in the higher density fractions (**Fig. 2G-I**). This structure and size  
191 heterogeneity was in contrast to *E. coli* OMVs that were uni-lamellar, spherical and dispersed  
192 (**Supplemental Fig. 2A**). Similar preparations from *S. aureus* when observed under TEM  
193 showed alternatively structured lamellar assemblies been secreted (**Fig. 2H**). Due to their  
194 structural and morphological characteristics we named these Gram-positive secretions 'multi-  
195 lamellar lipid bodies' (MLBs). FEM electron microscopy analysis noted alternating sheet-like  
196 structures (**Fig. 2I**). Hence, our analysis demonstrates Gram-positive bacteria secrete MLBs in  
197 addition to well-characterized MVs.

198 To further characterize MLBs and MVs secreted by Gram-positive bacteria, we separated  
199 MLBs and MVs using density gradient ultracentrifugation followed by quality measurements.  
200 We subjected vesicle mixture (MLBs+MV), purified MVs and MLBs to Dynamic Light  
201 Scattering (DLS). Similar to electron microscopy, DLS revealed two partly overlapping  
202 populations in the vesicle mixture (MV+MLB), one 50-100 nm and the other around 400  
203 nm (**Fig. 2J**). The size distribution of purified SA MVs was ~50-100 nm (**Fig. 2K**) and, ~400  
204 nm for purified MLBs (**Fig. 2L**). Thus *S. aureus* secretes heterogeneous populations of  
205 vesicles that differ in size and density. The immunological relevance of these vesicles was  
206 determined upon stimulation of human macrophages with increasing concentrations of MVs  
207 and MLBs isolated from *S. aureus*. To our surprise MLBs activated the inflammasome with  
208 abundant release of IL-1 $\beta$  (**Fig. 2M**) while MVs failed to activate the inflammasome for IL-  
209 1 $\beta$  release (**Fig. 2M**). However, MVs and MLBs could both induce TLR-dependent TNF- $\alpha$   
210 production (**Supplemental Fig. 2B**).

211 As MLBs and MVs showed different stimulation patterns we investigated the lipid  
212 composition of these vesicles. Both contained abundant amounts of lysyl-dipalmitoyl  
213 phosphatidylglycerol (lysyl-PG), one of the membrane lipids of *S. aureus* (43). On detailed  
214 analysis of the MS fragmentation pattern, diagnostic fragment ion and corresponding intensity  
215 showed the abundant species of lysyl PG were in the range of  $m/z$  800-900 in MVs, MLBs  
216 including the mixture of MLBs and MVs (MLB+MV) of *S. aureus* (**Supplemental Fig. 2C**).

217 Staphyloxanthin biosynthetic pathway products play an important role in innate immune  
218 activation (21, 22, 23). We thus postulated that MLBs and MVs may differ in their abundance  
219 of the staphyloxanthin type of lipids. The prominent lipid identified was in the range of  $m/z$   
220 400-500. After detailed analysis of their Shimadzu LCMS data and comparison of the  
221 retention time and MS spectra, we could detect the presence of 4,4'-diaponeurosporenoic  
222 acid, the precursor of the staphyloxanthin biosynthetic pathway. The relative abundant species



223 of 4,4'-diaponeurosporenoic acid, was detected at  $m/z$  432-433 in MLBs, and in a mixture of  
224 MVs and MLBs (MV+MLB) and in *S. aureus* bacteria (**Supplemental Fig. 2D**). However, of  
225 note MVs did not indicate the presence of 4,4'-diaponeurosporenoic acid at  $m/z$  433. This  
226 finding highlights our electron microscopic observation that MLBs are higher order structures  
227 formed in the presence of polyunsaturated lipids that appear to arise from the staphyloxanthin  
228 biosynthetic pathway (**Fig. 2G-I, Supplemental Fig. 2D**). Moreover, the LC-MS profile also  
229 identified small molecules such as c-di-AMP (CDN) and its derivative pApA in *S. aureus*  
230 MLBs. The retention time of c-di-AMP and pApA detected in *S. aureus* MLBs was around  
231 2.73 min and 2.75 min respectively when compared to synthetic ligands (**Supplemental Fig.**  
232 **2E, Supplemental Table 3**).

233 We performed Raman spectroscopic analysis of *S. aureus* MLBs to understand its  
234 biochemical cargo. MLB Raman spectra were carefully sorted as per dominating  
235 biomolecules using vibrational signatures deduced from the literature (**Supplemental Table**  
236 **1**). Average Raman spectra were generated for carbohydrates, proteins, lipids and nucleic  
237 acids (**Fig. 2N-P**). Nucleic acids and lipids were more prominent than carbohydrates  
238 (**Supplemental Table 1**). To identify the type of lipid present within the MLBs, we analysed  
239 spectral assignments and found unsaturated fatty acids and long-chain lipids as seen by  
240 Raman vibrations at 2974, 2967, 1732, 1669, 1528 and 1163  $\text{cm}^{-1}$ . The presence of prominent  
241 vibrations at 1009, 1163 and 1528  $\text{cm}^{-1}$  indicate microbial polyene-type lipids within the  
242 MLBs. The ribose type of nucleic acid vibration was seen by 1580, 1335 and 787  $\text{cm}^{-1}$  Raman  
243 bands. Detailed Raman assignments are provided in (**Supplemental Table 1**). Following the  
244 prominent detection of lipids by LC-MS, electron microscopy and Raman spectroscopy, we  
245 subjected MLB preparations to thermotropic analysis, performing electron microscopy at  
246 higher temperatures. Consistent with our previous observations, temperature elevation from  
247 25°C to 37°C produced an aqueous type of MLB texture (**Supplemental Fig. 2F**). Similar  
248 thermodynamic properties of MLBs were seen during Dynamic Light Scattering (DLS)  
249 analysis performed at 15°C to 55°C. The reduction in size at higher temperatures suggests  
250 thermochemical liquefaction or phase transition of lipids present within the MLBs  
251 (**Supplement Fig. 2G**). The above overall data indicate that Gram-positive bacterial  
252 secretions have at least two types of vesicles that differ in density, size and lipid content.  
253 Importantly, they differ in their immunological function of inducing the inflammasome in  
254 human macrophages and this may bestow a further immune-stimulatory capacity to bacteria  
255 during infection.

256 **MLBs from Gram-positive bacteria activate the STING dependent NLRP3 canonical**  
257 **inflammasome pathway**

258 To dissect the role of MLBs we postulated that MLBs could activate the inflammasome when  
259 secreted by bacteria. Similar to THP1 macrophages, release of IL-1 $\beta$  and cell death were seen  
260 when human blood-derived primary macrophages were stimulated with GBS and SA MLBs  
261 **(Fig. 3A, 3B).**

262 We purified MLBs from Gram-positive bacteria (SA and GBS) and stimulated macrophages  
263 replete or deficient in caspase-1 or caspase-4 to examine canonical inflammasome activation.  
264 Similar to bacterial infection, IL-1 $\beta$  responses were reduced in caspase-1 deficient cells  
265 whereas responses remained unchanged in caspase-4 deficient cells. This is consistent with  
266 the notion that Gram-positive bacteria lack LPS and hence are caspase-4 independent.  
267 Similarly, IL-1 $\beta$  responses were completely abrogated in adaptor ASC-deficient cells when  
268 stimulated with MLBs **(Fig. 3C, 3D)**. Similar to studies with bacterial infections, MLBs  
269 isolated from Gram-positive bacteria induced release of IL-1 $\beta$  that was STING-dependent but  
270 cGAS-independent **(Fig. 3E, 3F)**. MLBs also showed NLRP3 dependency when tested with  
271 the potent NLRP3 inhibitor MCC950 (44) **(Fig. 3G)**. As most activators of NLRP3 are K<sup>+</sup>  
272 efflux-dependent, we determined the significance of this efflux on MLB-mediated NLRP3  
273 activation. Indeed, blocking K<sup>+</sup> efflux prevented inflammasome activation when stimulated  
274 with MLBs, and when using nigericin as a positive control **(Fig. 3H, Supplemental Fig. 3A,**  
275 **3B)**. As a control to Gram-positive MLBs, Gram-negative outer membrane vesicles (OMVs)  
276 are taken up by cells via an endocytic pathway with LPS escaping the early endocytic  
277 compartments to activate caspase-11 (32) **(Supplemental Fig. 3C)**. Consistent with these  
278 findings, MLBs are taken up by cells via dynasore-sensitive dynamin-dependent endocytic  
279 pathways **(Fig. 3I)**.

280 **RNA aptamers present in bacterial small non-coding RNA activates STING to induce**  
281 **the IL-1 $\beta$  response**

282 Cytoplasmic bacterial nucleic acids activate the caspase-1 dependent canonical pathway (20,  
283 30). As our MLB analysis showed entrapped RNA, with the use of lipofectamine (LF) we  
284 delivered purified MLB RNA alone to cells either replete or deplete of caspase-4 or, caspase-  
285 1 and subsequently measured IL-1 $\beta$  and cell death responses. Cytoplasmic RNA (RNA+LF)  
286 showed a caspase-1 dependency for LDH response as compared to wild-type and caspase-4  
287 deficient cells. Consistent responses were found for IL-1 $\beta$  **(Fig. 4A, 4B)**. NLRP3 was also  
288 required for cytosolic sensing of MLB RNA, since RNA-induced IL-1 $\beta$  secretion was

289 profoundly reduced when inhibited with MCC950 (**Fig. 4C**). When MLB RNA was combined  
290 with LPS and delivered to the cytoplasm, cell death and IL-1 $\beta$  responses became both  
291 caspase-4 and caspase-1 dependent (**Supplemental Fig. 1A, 1B**). This set-up underlines the  
292 robustness of RNA as a PAMP for activation of the canonical inflammasome pathway.  
293 Cytokine production can be abrogated when enzymatically treated with RNase A (20).  
294 Experimentally translating cleavage of RNA ligands by RNase A in MLB-stimulated cells  
295 resulted in >80% reduction in cytokine production (**Fig. 4D**). At the same time cells treated  
296 with heat inactivated RNase A and DNase I and showed no difference in the release of IL-1 $\beta$   
297 (**Fig. 4E, 4F**). Similar observations were found for SA infections (**Fig. 1J, 1K, 1I**). Taken  
298 together, these findings indicate that Gram-positive bacteria and MLBs activate the canonical  
299 NLRP3 pathway via STING without activating cGAS using bacterial RNA.

300 Although no link is known between RNA and STING (45), we postulated that bacteria deliver  
301 RNA aptamers to the cytosol to sequester CDN ligands to STING for downstream activation  
302 of IL-1 $\beta$ . As several types of RNA (30) activate the inflammasome pathway, we investigated  
303 which RNA packed within the MLBs could activate the canonical inflammasome pathway via  
304 STING. To this end we isolated and purified different sizes of RNA from GBS, e.g. big RNA  
305 that contains >200 nucleotides and small non-coding  $\mu$ RNA that contains 15-200 nucleotides.  
306 Analysis by Qiagen QIAxcel capillary gel electrophoresis confirmed the size and purity of the  
307 RNA species (**Fig. 4G**).

308 STING is a well-studied receptor for CDN (6, 15, 16). Hence, small RNA aptamers may play  
309 a role in sequestering CDN to STING by a yet to be discovered mechanism. One such  
310 possibility arises through small RNA aptamers which may bind to small molecule metabolites  
311 such as CDN. To evaluate this possibility we tested GBS  $\mu$ RNA and big RNA for CDN-  
312 binding capacity in an assay using horse radish peroxidase labelled c-di-AMP as depicted in  
313 **Fig. 4H**. Consistent with our hypothesis, we found bacterial  $\mu$ RNA fraction carries CDN-  
314 binding capacity as a significant quantity of  $\mu$ RNA was bound to CDN whereas big RNA  
315 failed to bind (**Fig. 4H**). To further dissect the role of  $\mu$ RNA, we activated the NLRP3  
316 inflammasome by delivering purified  $\mu$ RNA species to genetically STING, cGAS-deficient or  
317 replete THP1 macrophages. To our surprise, we found the inflammasome was activated in a  
318 STING-dependent, cGAS-independent manner for  $\mu$ RNA species (15-200 nucleotides) from  
319 GBS and SA (**Fig. 4I, 4J**), resembling the activation pattern of bacterial infections and MLBs.  
320 Non-cytoplasmic activation by all RNA types resulted in no release of IL-1 $\beta$  (**Fig. 4I, 4J**).

321 Consistent with these results,  $\mu$ RNA isolated from GBS MLBs also activated the  
322 inflammasome in a STING-dependent, cGAS-independent manner (**Supplemental Fig. 4A**).

323 The above results indicate that Gram-positive bacteria may express specialized  $\mu$ RNA  
324 aptamers with a strong binding capacity to CDN. CDN are known signal transducers of  
325 quorum-sensing mechanisms in bacteria (16, 25) and production of CDNs is vital for the  
326 bacterial life cycle (46). In SA a well-studied quorum sensing system is regulated by the  
327 accessory gene regulator (*agr*) locus. The AGR quorum sensing system plays a central role in  
328 virulence regulation and pathogenesis. Mutation in the AGR locus shows no growth defects  
329 but leads to loss of various virulence-related genes causing a pleiotropic effect on bacterial  
330 pathogenicity (47, 25). A majority of clinical isolates produce high levels of transcripts  
331 dependent on the AGR locus. Hence, we postulated that expression of CDN aptamers may  
332 directly or indirectly be governed by the AGR locus. To evaluate this possibility further, we  
333 tested SA and isogenic mutant  $\Delta$ *agr* bacteria for the inflammasome activation pathway.  
334 Consistent with our hypothesis, the IL-1 $\beta$  response was abrogated when infected with  $\Delta$ *agr* in  
335 THP1 macrophages and human blood derived macrophages as compared to SA (**Fig. 4K, 4L**).  
336 These results were consistent with the previous literature, where it shows that *S. aureus*  
337 associated pore forming toxins enhance the process of inflammasome activation. We  
338 postulated the abrogated IL-1 $\beta$  response in  $\Delta$ *agr* infection was due to a lack of CDN aptamer  
339 expression in mutant bacteria. To further test this hypothesis we isolated  $\mu$ RNA from  $\Delta$ *agr*  
340 and SA and found equal production of  $\mu$ RNA when analysed on Qiaexcel capillary gel  
341 electrophoresis (**Fig. 4M**). Bacterial RNA, when given to the cell surface, induced TLR-  
342 dependent TNF- $\alpha$  response. When  $\Delta$ *agr* and SA isolated  $\mu$ RNA were tested for TLR-  
343 dependent TNF- $\alpha$  production,  $\Delta$ *agr* - $\mu$ RNA showed an equal and comparable TNF- $\alpha$  response  
344 to SA  $\mu$ RNA (**Fig. 4N**). However, when the same  $\mu$ RNA was given to the cytosol,  $\Delta$ *agr*  
345  $\mu$ RNA showed a pronounced reduction in IL-1 $\beta$  production compared to SA  $\mu$ RNA (**Fig.**  
346 **4O**). This further indicates that  $\Delta$ *agr*  $\mu$ RNA may lack CDN-binding aptamers and  
347 consequently lacks an ability to stimulate IL-1 $\beta$  production. To evaluate this hypothesis  
348 further, we tested  $\mu$ RNA from SA and  $\Delta$ *agr* for CDN-binding capacity in an assay using horse  
349 radish peroxidase-labelled c-di-AMP as shown in **Fig. 4P**.  $\mu$ RNA from SA showed more  
350 CDN-binding capacity than  $\mu$ RNA from mutant  $\Delta$ *agr* bacteria (**Fig. 4P**). To independently  
351 confirm the comparative binding capacity of SA and  $\Delta$ *agr*  $\mu$ RNA to CDN, we subjected  
352 CDN-bound RNA fractions to LC-MS analysis. The increasing concentration of SA  $\mu$ RNA  
353 purified upon binding to CDN showed the prominent presence of bound CDN at retention

354 time of 3.31 min (**Supplemental Fig. 4B (II)**). However, at the same time  $\Delta agr$   $\mu$ RNA  
355 fractions showed no detectable bound CDN (**Supplemental Fig. 4B (III)**). Of note the SA  
356 and  $\Delta agr$   $\mu$ RNA used in this analysis did not show any residual CDN (**Supplemental Fig. 4B**  
357 **(I)**). Collectively, SA  $\mu$ RNA but not the  $\Delta agr$   $\mu$ RNA have the CDN binding capacity and  
358 hence can be concluded that  $\Delta agr$   $\mu$ RNA lack CDN-binding aptamers. Moreover, owing to its  
359 lack of CDN-binding aptamers, after external addition of CDN to  $\Delta agr$ ,  $\mu$ RNA did not  
360 recover its IL-1 $\beta$  producing ability (**Supplemental Fig. 4C**). All the above results indicate an  
361 essential role of the CDN-binding aptamer in IL-1 $\beta$  production, and for the AGR locus of *S.*  
362 *aureus* for expression of CDN-binding aptamers.

### 363 **Differentially abundant $\mu$ RNA species are present in *S. aureus* MLBs**

364 Microbial extracellular vesicles contain small RNA (48), which may regulate the host immune  
365 system upon cytoplasmic delivery (48, 49). Our analysis raises the possibility that CDN-  
366 binding RNA aptamers are enriched in MLBs which, in turn, activates STING within the host  
367 cytosol. Hence, to characterize RNA species from MLBs,  $\mu$ RNA isolated from MLBs (SA-  
368 MLB) underwent deep RNA sequencing and were compared to *S. aureus* (SA) and  $\Delta agr$  *S.*  
369 *aureus* (SA- $\Delta agr$ )  $\mu$ RNA. For sequence analysis, obtained RNA seq reads were mapped on *S.*  
370 *aureus* reference genome (**Supplemental Result SR2**). We found 186 genomic regions  
371 showing differentially abundant RNA seq reads on the *S. aureus* N315 genome (**Fig. 5A**).  
372 Similar results were obtained for *S. aureus* NCTC 8325 (data not shown). 85, 8 and 17  
373 genomic regions were unique to SA, SA- $\Delta agr$  and SA-MLB respectively. However, 41, 8 and  
374 5 genomic regions were common to SA, SA- $\Delta agr$ , and SA-MLB, respectively. 22 genomic  
375 regions were abundantly present in all three and were mainly comprised of 6S RNA, tmRNA  
376 and 4.5S RNA and reads arriving from a noncoding pseudo gene (**Supplemental Fig. 5A**).  
377 One such read (named as HP) was commonly abundant in all three libraries and was used as a  
378 control in our further analysis. Collectively, our NGS analysis raises the possibility of a  
379 unique set of  $\mu$ RNA species enriched within SA-MLB (**Fig. 5A, Supplemental Fig. 5A**).  
380 Further, scrutinization revealed several differentially abundant genomic locations covering  
381 known sRNA from *S. aureus* (**Supplemental Fig. 5A, 5B, Supplemental Result SR2**).  
382 Interestingly, reads for Rsa C, Sbr C, RNAIII, and WAN01CC66-rc were abundantly present  
383 in SA and SA-MLB and absent in SA- $\Delta agr$  (**Supplemental Fig. 5B**). All other sRNAs were  
384 differentially abundant in reads of SA, SA-MLB and SA- $\Delta agr$  (**Supplemental Fig. 5B, 5C,**  
385 **Supplemental Table 4**). Interestingly, our analysis demonstrate that SA MLBs contain  
386 distinct parts of sRNA species that are differentially enriched from the originating bacteria

387 **(Supplemental Results SR2, Supplemental Fig. 5D)** indicating the possibility of specific  
388 processing and packaging of sRNA species within MLBs of *S. aureus*.

389 **A specific fragment of RNAIII with A,7,8,9,A stem loop domain present in *S. aureus***  
390 **MLBs activate the inflammasome pathway**

391 RNAIII is a known effector molecule of the quorum sensing system and controls expression  
392 of various virulence genes in *S. aureus* (56, 57). We further characterized the key regulatory  
393 sRNA, RNAIII from *S. aureus*. Reads of SA, SA-MLBs and SA- $\Delta agr$   $\mu$ RNA showed that  
394 RNAIII was abundantly mapped in SA and SA-MLBs, however were SA- $\Delta agr$  dependent.  
395 For validation of the role of RNAIII in activation of the inflammasome, we *in-vitro*-  
396 transcribed RNAIII and delivered it in increasing concentrations cytosolically to THP1  
397 macrophages. Surprisingly, RNAIII activated the inflammasome for the release of IL-1 $\beta$  (**Fig.**  
398 **5B**). Surface stimulations of RNAIII and LF did not induce the NLRP3 inflammasome  
399 pathway (**Fig. 5B**). To access this further, we checked the CDN binding capacity of RNAIII  
400 in an assay using horse radish peroxidase labelled c-di-AMP. Similar to SA  $\mu$ RNA, RNAIII  
401 could bind to c-di-AMP (**Fig. 5C**) Additionally, mass spectrometry based binding assay  
402 further confirmed binding of c-di-AMP to RNAIII (**Supplemental Fig. 5E**), indicating the  
403 possibility that RNAIII may contain a CDN-binding aptamer.

404 RNAIII has a complex secondary structure of 514 nucleotides and comprises 14 hairpin  
405 domains (58, 59). Three long range interactions present on the RNAIII brings the 3' and  
406 5' ends in close proximity. The central domain contains the branched structure of stem loop 7,  
407 8 and 9 which is enclosed by helix A (56, 57). To further analyse the RNAIII in detail, we  
408 mapped the RNA seq reads of SA and SA-MLBs on *S. aureus* RNAIII 514 bp genomic locus  
409 (**Supplemental Fig. 5F**). Our analysis revealed that hairpins 1-6 and 10-14 were present in  
410 SA (blue) and SA-MLBs (pink)  $\mu$ RNA (**Supplemental Fig 5F**). Some reads present in the 1-  
411 6 and 10-14 hairpin regions were overlapping in SA and SA-MLB (**Supplemental Fig. 5F**).  
412 The SA-MLB reads showed the unique presence of the central domain A,7,8,9,A hairpins and  
413 some stretches in the 3' regions corresponding to 1-380 nt, and 5' regions corresponding to  
414 202-514 nt. The overlaid reads also confirmed that the central domain A,7,8,9,A  
415 corresponding to 202-317 nt is exclusively present within SA-MLBs (**Supplemental Fig. 5F**).  
416 We amplified the central domain A,7,8,9,A from an independently prepared cDNA of the SA,  
417 SA- $\Delta agr$  and SA-MLB  $\mu$ RNA. Comparable to the sequencing results, the central domain  
418 (A,7,8,9,A) was present in SA-MLBs, absent in SA- $\Delta agr$ , and slightly present in SA (**Fig.**  
419 **5D**). HP, the sRNA expressed in all three  $\mu$ RNA libraries was used as a control (**Fig. 5D**).

420 Following this, we *in-vitro*-transcribed 3' and 5' regions corresponding to 1-380 nt and 202-  
421 317 nt, respectively with the overlapping central domain of RNAIII according to the reads  
422 within SA-MLB. These *in-vitro*-transcribed RNA when given cytosolically to THP1  
423 macrophages could induce the inflammasome with release of IL-1 $\beta$  (**Supplemental Fig. 5G**).  
424 As the central domain of A,7,8,9,A hairpins corresponding to 202-317 nt were specifically  
425 present in SA-MLBs we *in-vitro*-transcribed it with control sRNA HP and stimulated  
426 cytosolically on THP1 macrophages. Interestingly, the central domain (202-317 nt) robustly  
427 activated the inflammasome leading to IL-1 $\beta$  release (**Fig. 5E**) similar to RNAIII (1-514 nt)  
428 (**Fig. 5B**), the control sRNA HP however did not induce IL-1 $\beta$  production (**Fig. 5E**).  
429 Moreover, resembling the activation pattern of bacterial  $\mu$ RNA, central domain (202-317 nt)  
430 could release IL-1 $\beta$  in a cGAS-independent, STING-dependent manner (**Fig. 5F**). This  
431 indicates that the A,7,8,9,A hairpins of RNAIII present within SA-MLBs are immuno  
432 stimulatory. To characterize RNAIII further we *in silico* folded RNAIII and different parts of  
433 RNAIII present within the SA-MLBs using RNA fold web server-Vienna RNA Package (60).  
434 The full RNAIII structure (1-514 nt) resembled the predicted structure of 14 hairpins. The  
435 central domain of A,7,8,9,A loops structurally resembles known CDN binding aptamers (61).  
436 A similar central domain structure was seen in different parts of the RNAIII, such as 1-380,  
437 202-514 and 202-317. This suggest that A,7,8,9,A hairpins of the central domain may be  
438 important for RNAIII to activate the inflammasome. Complimenting our mapped RNA seq  
439 reads on RNAIII (**Supplemental Fig. 5F**), we *in silico* simulated mutations around  
440 nucleotides 208-217 corresponding to RNAIII stem A. Specific mutations at 212, 213, and  
441 214 were vulnerable for the formation of the central domain. Nucleotides from 1-213 and  
442 213-514 of RNAIII failed to assemble a similar secondary structure to the A,7,8,9,A central  
443 domain (**Supplemental Fig. 5H**). Hence, we *in-vitro*-transcribed RNAIII from 1-213 and  
444 213-514 nt which failed to show the formation of the central domain. The *in-vitro*-transcribed  
445 1-213 and 213-514 nt RNA when given cytosolically failed to induce release of IL-1 $\beta$  in  
446 contrast to complete (1-514) RNAIII (**Supplemental Fig. 5I**). These results suggests that the  
447 formation of the branched central domain of 202-317 nucleotides with hairpin A,7,8,9,A is  
448 crucial for CDN binding and release of IL-1 $\beta$ . Moreover this above mutational analysis raises  
449 the possibility that the structure of the RNAIII which can bind to CDN is more important than  
450 the sequence. To this end we used spinach aptamer with conditionally fluorescent molecule  
451 difluoro-4-hydroxybenzylidene imidazolinone (DFHBI) (62) as depicted in **Fig. 5G** to  
452 independently confirm the structure specific CDN binding capacity of hairpin A,7,8,9,A of  
453 RNAIII. The fluorescence of spinach aptamer depends on the formation of a second stem loop

454 (62). Hence, we replaced the second stem loop with the aptamer domain A,7,8,9,A of RNAIII.  
455 Consistent with previous results, the A,7,8,9,A central domain linked to spinach aptamer  
456 exhibited strong fluorescence activation in a concentration-dependent manner from 0.1 to 10  
457 nM c-di-AMP (**Fig. 5G**).

458 To consolidate our findings of a dependency on STING, we performed a STING dimerization  
459 assay following activation by RNAIII, SA  $\mu$ RNA or  $\Delta agr$   $\mu$ RNA. Consistent with  
460 inflammasome activation,  $\Delta agr$   $\mu$ RNA showed reduced STING dimerization compared to SA  
461  $\mu$ RNA and RNAIII (**Supplemental Fig. 5J**). Blocking  $K^+$  efflux reduced the induction of  
462 NLRP3 activation (**Fig. 3H**). Hence, we investigated the trafficking of STING to the  
463 lysosome (LAMP-1+ structures) as an indicator of lysosome-dependent NLRP3 activation  
464 following STING dimerization. SA  $\mu$ RNA was transfected into human macrophages and  
465 stained with anti-LAMP-1 and anti-STING antibody to determine lysosomal trafficking of  
466 STING. Upon activation with  $\mu$ RNA, STING concentrated in small vesicle-like punctate  
467 structures compared to a dispersed pattern in control preparations (**Supplemental Fig. 5K(I)**).  
468 LAMP-1 co-localization with STING was pronounced in these punctate STING structures  
469 upon stimulation with SA  $\mu$ RNA as compared with the non-stimulated control  
470 (**Supplemental Fig. 5K(I)**). As shown previously, due to a lack of CDN aptamer the IL-1 $\beta$   
471 responses were abrogated by  $\Delta agr$   $\mu$ RNA. Hence we postulated and confirmed that  $\Delta agr$   
472  $\mu$ RNA was also abrogated in co-localizing STING to the lysosome compared to SA  $\mu$ RNA  
473 (**Supplemental Fig. 5K(I)**). Consistent with these results GBS and SA bacterial infections  
474 also led to higher co-localization of STING within lysosomes (**Supplemental Fig. 5K(II)**).  
475 These data indicate that CDN binding RNA aptamers present in the  $\mu$ RNA fraction can  
476 sequester CDN ligands to STING, thus acting as potent inducers of the inflammasome during  
477 Gram-positive bacterial infection (**Supplemental Fig. 5L**).

#### 478 **Staphyloxanthin type of lipids in MLBs can target RNA PAMPs to the cytoplasm for** 479 **activation of the inflammasome**

480 Taking advantage of the robust activation of STING by  $\mu$ RNA we investigated how MLB  
481 RNA reaches the cytoplasm to serve as a PAMP during inflammasome activation. In *S.*  
482 *aureus*, multiple pore forming toxins and hemolysins have shown to evolve NLRP3  
483 inflammasome activation. Especially  $\alpha$ -hemolysin is shown to release IL-1 $\beta$  in caspase-1  
484 dependent manner in both human and mouse monocytic cells (8). Similarly, GBS pigment/  
485 lipid toxin was also shown to induce membrane permeabilization which causes the efflux of  
486 intracellular potassium activating the NLRP3 inflammasome via caspase-1 (24). Hemolytic



487 strains of GBS have been reported to induce NLRP3 inflammasome for the release of IL-1 $\beta$  in  
488 murine dendritic cells and macrophages (38, 20). Using Raman spectroscopy, electron  
489 microscopy and LC-MS analysis we identified the presence of staphyloxanthin biosynthetic  
490 pathway precursors and derivatives within MLBs. We then queried whether these  
491 polyunsaturated lipids from MLB had the capacity to deliver RNA aptamers for cytoplasmic  
492 inflammasome activation.

493 Polyene biosynthesis pathway is a major contributor to the synthesis of staphyloxanthin and  
494 granadaene by *S. aureus* and GBS, respectively (22, 23, 63). Both these pathways contain  
495 many structurally similar polyunsaturated lipids. Granadaene has been implicated in  
496 inflammasome activation by GBS (64) though precise mechanisms are unknown.  
497 Accordingly, we postulated that similar products of the staphyloxanthin and granadaene  
498 biosynthetic pathways, such as 4,4'-diaponeurosporenoic acid, are present in their respective  
499 MLBs and can transfer MLB-embedded RNA PAMPs to the cytoplasm.

500 To this end we HPLC-purified staphyloxanthin (St2) and its pathway precursor 4,4'-  
501 diaponeurosporenoic acid (St1) from *S. aureus* (**Supplemental Fig. 6,7**). The presence of St1  
502 and St2 in HPLC fractions was confirmed by analysis of UV-Vis, MS and NMR spectra  
503 (**Supplemental Result 1, Supplemental Fig. 7**). Having purified these compounds, we  
504 examined their Raman spectra and found bacterial carotenoid-specific strong vibrations at  
505 975, 1014, 1168, 1210, 1294, 1451, 1528 and 1581 cm<sup>-1</sup> (**Fig. 6A, 6B, Supplemental Table**  
506 **2**). These Raman vibrations were conserved in MLBs isolated from *S. aureus* and GBS and  
507 were also present in Raman spectra of complete *S. aureus* and GBS bacteria (**Fig. 2N-P,**  
508 **Supplemental Table 1**). Cryo-electron microscopy of purified lipid 4,4'-diaponeurosporenoic  
509 acid (St1) revealed micelle-like lamellar structures (**Fig. 6C**) resembling the structure of  
510 MLBs released from bacteria.

511 After empirical optimization of a sub-lethal purified lipid St1, St2 concentration, we  
512 examined whether St1 and St2 have the potential to deliver bacterial RNA to the cytosol. To  
513 this end St1 and St2 in the absence of stabilizers and when stimulated alone did not induce  
514 any cytoplasmic inflammasome activation (**Fig. 6D**). However RNA was embedded while  
515 rehydrating purified lipids St1, St2 and stimulated on THP1 macrophages. The St1 and St2  
516 lipid alone or RNA alone did not activate the inflammasome while the combination of both  
517 induced IL-1 $\beta$  release in a concentration-dependent manner (**Fig. 6D**). These results indicate  
518 that staphyloxanthin along with the pathway precursor 4,4'-diaponeurosporenoic acid could  
519 deliver RNA PAMPs to the cytosol to induce the inflammasome (**Fig. 6D**). This may indicate

520 synergism between these compounds and RNA within MLBs to activate the inflammasome.  
521 We further confirmed the capacity of staphyloxanthin to target PAMPs to cytosolic  
522 inflammasome activation using primary human blood-derived macrophages (**Fig. 6E**).  
523 Collectively, the above data demonstrate the mechanism by which MLBs deliver PAMPs such  
524 as RNA to the cytosol with the assistance of staphyloxanthin-type lipids.

525 As seen in the chemical analysis, MLBs are enriched with staphyloxanthin and its precursor  
526 (**Fig. 2N-P, Supplemental Fig. 2D**). Staphyloxanthin is an important virulence factor in SA.  
527 Bacteria lacking this carotenoid pigment grow normally but are rapidly killed by neutrophils  
528 and lack the ability to cause skin infection and abscess formation (21, 65). The biosynthetic  
529 pathway for staphyloxanthin starts with farnesyl diphosphate, a key intermediate in the  
530 isoprenoid biosynthetic pathway, and consists of six enzymes: 4,4'-diapophytoene synthase  
531 (CrtM), 4,4'-diapophytoene desaturase (CrtN), 4,4'-diaponeurosporene oxidase (CrtP),  
532 glycosyltransferase (CrtQ) and acyl transferase (CrtO) and the newly discovered 4,4'-  
533 diaponeurosporen-aldehyde dehydrogenase (AldH) (22, 23) (**Supplemental Fig. 6A**). In *S.*  
534 *aureus*, five of the staphyloxanthin biosynthesis genes are arranged in a crtOPQMN operon.  
535 Hence, we inhibited 4,4'-diapophytoene synthase (CrtM) in SA using the small molecule  
536 inhibitor, naftifine (66). As expected, naftifine-treated SA turned colorless in contrast to the  
537 golden colour seen with untreated SA. Of note, similar treatment of GBS with naftifine  
538 rendered GBS colonies colorless without affecting bacterial growth (**Fig. 6F**). Raman analysis  
539 of naftifine-treated bacteria showed a reduction in vibrations corresponding to the bacterial  
540 unsaturated lipids at wavenumber 1528, 1168, 1013  $\text{cm}^{-1}$  and 1528, 1129, 1012  $\text{cm}^{-1}$  for SA  
541 and GBS, respectively (**Fig. 6G, 6H**). Inflammasome activation was reduced in naftifine-  
542 treated bacterial infection in primary human blood-derived macrophages (**Fig. 6I, 6J**) while  
543 the inflammatory response (e.g.  $\text{TNF}\alpha$ ) remained unchanged for naftifine-treated SA and GBS  
544 (**Fig. 6K, 6L**). To gain further insights as to whether naftifine inhibition had any effect on the  
545 synthesis of  $\mu\text{RNA}$  aptamers, we isolated  $\mu\text{RNA}$  from GBS and SA treated with naftifine and  
546 stimulated to THP1 macrophages. A pronounced IL-1 $\beta$  secretion was seen with both treated  
547 and non-treated  $\mu\text{RNA}$  (**Fig. 6M, 6N**). This shows that naftifine inhibition reduces production  
548 of staphaloxanthin biosynthetic pathway lipids. However, naftifine treatment had no effect on  
549 synthesis of RNA aptamers. Overall, the above results demonstrate an evolutionary interplay  
550 between lipid toxin and RNA PAMP to specifically activate the inflammasome to release IL-1  
551  $\beta$ .

552 **Gram-positive sepsis patients shows the hallmarks of MLB-mediated inflammasome**  
553 **activation**

554 Organ damage and mortality in sepsis have been attributed to a deleterious and dysregulated  
555 host responses to infection (67). We investigated whether our observed immune activation  
556 pathway is conserved in clinical isolates arising from Gram-positive infections. *S. aureus*  
557 patient isolates (n=50) collected from different clinical departments were screened  
558 (**Supplemental Table 6**). Those isolates collected from patients mainly showed an infection  
559 focus with intravascular catheter, pneumonia and wound infection (**Fig. 7A**). Of all blood  
560 culture positive patients, 10% had sepsis (organ dysfunction) according to the most recent  
561 Sepsis-3 definition (67). When screened for the presence of RNAIII 16% of obtained bacterial  
562 patient isolates showed undetectable RNAIII. We thus isolated  $\mu$ RNA from RNAIII positive  
563 (P5, P11, P27) and negative (P14, P15, P36) *S. aureus* isolates. The isolated  $\mu$ RNA was  
564 delivered cytosolically in THP1 macrophages in equimolar concentrations. Consistent with  
565 our previous findings using *S. aureus* (LS1) and  $\Delta$ agr strain the RNAIII negative clinical  
566 bacterial isolates (P14, P15, P36) did not activate the inflammasome pathway (**Fig. 7B**) while  
567 RNAIII positive bacterial isolates (P5, P11, P27) had a pronounced release of IL-1 $\beta$  (**Fig. 7B**).  
568 These results indicate the presence of RNAIII in *S. aureus* is correlated to  $\mu$ RNA-dependent  
569 inflammasome activation and release of IL-1 $\beta$  during severe Gram-positive infections.

570 During inflammasome activation GSDMD (55 kDa) is cleaved into N (30 kDa) and C (22  
571 kDa) terminal subunits. The cleaved GSDMD triggers pyroptosis and a robust IL-1 $\beta$   
572 production (2). To confirm inflammasome activation through GSDMD cleavage in an  
573 independent sepsis cohort we processed plasma from four *S. aureus* sepsis patients  
574 (**Supplemental Table 7**). As controls, we collected plasma from non-septic patients  
575 undergoing cardiac surgery both pre-operatively (T1) and at 6 h post-operatively (T6). On  
576 western blot analysis, plasma from the sepsis patients showed two distinct bands at 55 and 22  
577 kDa, indicating cleaved GSDMD, while the non-septic ICU controls did not show this  
578 GSDMD cleavage (**Fig. 7C**). We subsequently isolated  $\mu$ RNA from the plasma of *S. aureus*  
579 sepsis patients and non-septic controls and cytosolically delivered this  $\mu$ RNA into THP1  
580 macrophages to determine inflammasome activation.  $\mu$ RNA from *S. aureus* sepsis patients  
581 elicited a pronounced IL-1 $\beta$  response as compared to the cardiac surgery controls (**Fig. 7D**).  
582 The surface stimulation of  $\mu$ RNA from patients and controls failed to release IL-1 $\beta$  (**Fig. 7D**).  
583 These details indicate that plasma from septic patients with *S. aureus* infection may contain  
584 hallmark RNA aptamers that could activate the inflammasome pathway (**Fig. 7D**). Taken

585 together, our translational results suggest that *S. aureus*  $\mu$ RNA-dependent cytosolic  
586 inflammasome induction is an important feature of Gram-positive sepsis.

587

## 588 DISCUSSION

589 Sepsis is a dysregulated host response to infection leading to life-threatening organ  
590 dysfunction (67). With more than 19 million cases annually, sepsis is a leading cause of death  
591 worldwide and a major socioeconomic burden (68, 69). Activation of cytosolic caspases  
592 leading to inflammasome activation is emerging as a key host defense strategy for clearance  
593 of bacteria. Under this evolutionary pressure both bacteria and host may develop new  
594 strategies for regulated inflammasome activation. GBS uses granadaene and RNA to activate  
595 the inflammasome (20, 64). How these PAMPs orchestrate activation and whether any  
596 upstream mechanisms are induced by bacteria, are still uncertain (69).

597 In this current study, we demonstrated that GBS and SA utilize  $\mu$ RNA aptamers for  
598 downstream activation of the canonical inflammasome pathway. The specialized  $\mu$ RNA  
599 aptamers with capacity to bind CDN when delivered to host cytoplasm, activate the STING-  
600 dependent canonical inflammasome to release IL-1 $\beta$ .

601 STING is an endoplasmic reticulum resident protein activated by second messenger CDN  
602 ligands for pronounced interferon responses (6, 16). Canonical inflammasome induction  
603 following activation of STING is known in literature. Moreover few mechanisms of how  
604 STING activation propagates to inflammasome activation are also shown (87, 88, 36, 70). For  
605 DNA activators of NLRP3, a cGAS and STING-dependent lysosomal pathway has been  
606 shown in human cells (36). Evidence is lacking for RNA activators and it remains uncertain  
607 how Gram-positive bacteria use these pathways during infection. Our data suggest that  
608 bacterial RNA PAMPs activate STING-dependent IL-1 $\beta$  responses on arrival in the  
609 cytoplasm. Small RNA (<200 nucleotides) which comprises CDN RNA aptamers may  
610 sequester CDN ligands to STING for NLRP3 activation, albeit bypassing cGAS (**Fig. 4I, 4J**).

611 The main findings of our work are the delivery of CDN to host cells for activation of STING  
612 by Gram-positive bacteria through MLBs, and the involvement of RNA aptamers in this  
613 process. Consistent with this observation, we found that CDN binding RNA aptamer-  
614 mediated STING activation is a dominant pathway for canonical inflammasome activation  
615 during Gram-positive bacterial infection in human macrophages. The possibility of a  
616 redundant involvement of other cytosolic receptors cannot be ruled out as nucleic acid  
617 signalling shows cell type-and host species-type specificities. The co-localization of STING  
618 and LAMP1 upon Gram-positive bacterial infection or stimulation with CDN aptamers  
619 suggests that, upon activation by RNA aptamers, STING translocates to the lysosome. This

620 coincides with a fall in cytoplasmic K<sup>+</sup> levels and activation of the NLRP3 inflammasome.  
621 STING activation and downstream NLRP3-dependent inflammasome activation have been  
622 poorly studied to date. Our study provides important clues as to how Gram-positive bacteria  
623 deliver CDN to activate STING. The investigation of STING activation propagating to the  
624 NLRP3 merits further study in the light of the current findings (71).

625 The concept of inflammasome activation by cytosolic bacterial RNA raises the question as to  
626 how microbial RNA can gain access to this compartment. To activate cytosolic PRRs, specific  
627 PAMP delivery mechanisms are required. Here, we demonstrate that Gram-positive bacteria  
628 release at least two populations of vesicles named membrane vesicles (MVs) and multi-  
629 lamellar lipid bodies (MLBs). Similar vesicles have been reported for other organisms e.g.  
630 mycobacteria (72). A large heterogeneity of EVs secreted by Gram-positive bacteria has also  
631 been reported (32, 34). However, the current literature lacks both structural and functional  
632 analysis of these vesicles. GBS EVs have recently been implicated in causing premature birth  
633 in a mouse model (35). In this current study we structurally characterized MVs and MLBs  
634 secreted by GBS and SA and demonstrated differences in both size and lipid content.  
635 Biochemically, MLBs have abundant polyunsaturated lipids including those from the  
636 staphyloxanthin biosynthetic pathway. These lipids are highly hydrophobic and,  
637 consequently, may contribute to the overall hydrophobicity of MLBs. Structurally, they  
638 contain concentric shells of lipids with RNA PAMPs packed within. We also found that  
639 Gram-positive MLBs show phase transition properties (**Supplemental Fig. 2F, 2G**) providing  
640 specific biophysical properties to Gram-positive vesicles. MLBs replicate an important and  
641 similar function as live bacteria in inducing the inflammasome. Consistent with this we report  
642 that MLBs can activate the canonical pyroptotic cell death pathway and is dependent on  
643 caspase-1, ASC and NLRP3 (**Fig. 3C, 3D**). While understanding the activation pattern of  
644 MLBs, how the bacterial PAMPs get packed within the MLBs remains unclear.

645 Packaging of distinct RNA in the vesicles is a known general phenomenon (48, 49). We  
646 identified enrichment of less than 200 nucleotide  $\mu$ RNA in the SA MLBs. The RNA content  
647 of the MLBs differs remarkably to the originating bacteria when analysed through deep  
648 sequencing (**Fig. 5A, Supplemental Fig. 5A-D**). This may relate to active mechanisms within  
649 bacteria that process, sort and pack  $\mu$ RNA into the MLBs (48, 49). Moreover, RNA  
650 sequencing showed levels of sbr-C, Rsa-C, RNAIII and WAN01CC66-rc were AGR  
651 dependent and entirely expressed in SA and MLBs (**Supplemental Fig. 5D**). A well-  
652 characterized RNAIII in *S. aureus* acts via trans-acting factors as it has the possibility to form  
653 a secondary structure for the binding of proteins (56, 58). A RNAIII central domain

654 comprising hairpin 7 has a potential recognition site for trans-acting factors due to the  
655 conserved sequence of UCCCAA which makes it of particular interest (59). Our analysis also  
656 demonstrates a selective enrichment of central domain A,7,8,9,A of RNAIII within MLBs.  
657 Detailed analysis revealed that the structure formed by the central domain A,7,8,9,A of  
658 RNAIII is essential for activation of the inflammasome pathway (**Supplement Fig. 5F, 5H,**  
659 **5I**). Mutations in the central domain hampers the structure and fails to activate the  
660 inflammasome (**Supplemental Fig. 5H, 5I**). Moreover, the central domain of RNAIII when  
661 fused with spinach aptamer showed CDN-binding capacity with varying concentrations of  
662 RNA and CDN. Altogether, MLB-mediated release of RNA aptamers within the cytosol to  
663 activate the inflammasome may be an important conserved mechanism within host-pathogen  
664 interactions.

665 Bacterial EVs are taken up by immune cells through a clathrin-mediated endocytic pathway  
666 that results in activation of caspase-11 (34). Gram-positive MLBs also follow a similar  
667 pathway for cellular entry. Their entry is dynamin-dependent as inhibition of dynamin leads  
668 to the loss of inflammasome induction by MLBs (**Fig. 3I**). EVs may thus carry specific  
669 molecular components that help to transfer entrapped PAMPs to the cytosol. MLBs were  
670 enriched with polyunsaturated lipids (**Supplemental Fig. 2D, 6A**). These lipids are produced  
671 by the staphyloxanthin and granadaene biosynthesis pathway in SA and GBS, respectively  
672 (22, 23, 65). Staphyloxanthin and its pathway intermediate, 4,4'-diaponeurosporenoic acid  
673 have strong capacities for transferring PAMPs to the cytosol (**Fig. 6D, 6E**). This indicates  
674 potential new mechanisms by which these bacterial metabolites participate in bacterial  
675 pathogenesis. Interestingly, inhibition of crtM, a key enzyme in staphyloxanthin biosynthesis,  
676 reduced the ability of SA to activate the inflammasome without affecting the bacterial  
677 capacity to produce RNA aptamers (**Fig. 6I, 6J, 6M, 6N**). These findings reveal the  
678 possibility of developing targeting drugs or chemical probes to control MLB-mediated effects  
679 during Gram-positive sepsis.

680 During the course of our investigation staphyloxanthin and 4,4'-diaponeurosporenoic acid  
681 from SA were HPLC-purified and characteristic Raman vibrational fingerprint spectra were  
682 determined for these molecules. Our determined Raman spectra of staphyloxanthin and 4,4'-  
683 diaponeurosporenoic acid molecules add to the current knowledge of microbial pigments and  
684 their properties. Staphyloxanthin types of lipids from SA were found to be pathogenic in  
685 combination with PAMPs within MLBs.

686 On the other hand, the same MLB lipids when embedded with PAMPs showed pronounced  
687 induction of the canonical inflammasome. These findings complement and advance current

688 knowledge where pathogenic bacteria may induce over-activation of inflammatory processes  
689 through production of specific lipids and RNA, whereas absence of staphyloxanthin (47) or  
690 RNAIII (57) may render *S. aureus* an asymptomatic colonizer (21, 66). In a similar  
691 hypothesis, the balance of IL-1 $\beta$  and Type-I interferon responses could regulate a successful  
692 host defense against *S. pyrogenesis* (73). Our studies in combination with others (16, 74)  
693 suggest cGAS-STING pathway is a central pathway regulated by pathogenic Gram-positive  
694 bacteria that causes the imbalance in IL-1 $\beta$  and Type-I interferon responses. Consistent with  
695 this, staphyloxanthin type lipid biosynthetic pathways have evolved in many Gram-positive  
696 organisms. Strikingly, in the case of *S. aureus*, loss of its staphyloxanthin producing ability  
697 leads to bacterial clearance by lymphocytes (21). Corroborating these observations, the  
698 presence of RNAIII was detected in isolates from *S. aureus* infected patients.  $\mu$ RNA from the  
699 RNAIII positive patient isolates could profoundly activate the cytosolic inflammasome  
700 pathway in comparison with RNAIII negative patient isolates (**Fig. 7B**). These results  
701 highlight the conserved nature of our findings in bacteria originating from clinical settings.  
702 Moreover, it may also indicate an association between the presence of RNAIII and  
703 inflammasome activation in *S. aureus* patients. To study these findings further we found  
704  $\mu$ RNA from plasma of *S. aureus* sepsis patients activated the inflammasome with abundant  
705 release of IL-1 $\beta$ , whereas  $\mu$ RNA isolated from control patient plasma failed to activate the  
706 inflammasome (**Fig. 7D**). Translating these findings further, the same plasma from *S. aureus*  
707 sepsis patients showed-hallmarks of the activated inflammasome in terms of cleaved  
708 GSDMD-P22 whereas, control patients failed to show an activated inflammasome and  
709 cleaved GSDMD (**Fig. 7C**). Hence, all the above findings may provide a new perspective for  
710 the pathogenicity of Gram-positive bacterial infection in man.



## 711 MATERIALS AND METHODS

### 712 Bacterial strains and growth conditions

713 GBS wild type strain NEM 316, *S. aureus* wild type strain LS1 and isogenic mutant  $\Delta agr$   
714 were grown overnight in THY Medium (Todd-Hewitt Broth with 2% yeast extract) at 37°C.  
715 The overnight cultures were further diluted and grown until the late logarithmic phase. *S.*  
716 *aureus* patient isolates and *E. coli* patient isolates were similarly grown in THY Medium and  
717 LB broth, respectively at 37°C 160 rpm.

### 718 Purification and characterization of bacterial MLBs and OMVs.

719 MLBs were purified from GBS, SA and OMVs were purified from *E. coli*, with some  
720 modifications (75, 76). In brief, GBS and SA were grown in THY at 37°C 160 rpm. The  
721 culture was centrifuged at 10,000 rpm for 15 min at 4°C. The bacteria-free supernatant was  
722 further filtered through a 0.22  $\mu\text{m}$  filter. Bacterial vesicles were isolated from the supernatant  
723 by ultracentrifugation at 400,000 g for 2 h at 4°C in Beckman (TLA-100.3 rotor). The pelleted  
724 vesicular fraction was then washed with sterile PBS for 1 h. For purification of MLBs and  
725 MVs, vesicular fraction was further purified by opti-prep gradient from 45 to 15% made in 10  
726 mm HEPES, 0.85% NaCl followed by 200,000 g, 2 h ultracentrifugation and different  
727 fractions were collected and washed. MLBs were enriched at a density of approximately  
728  $>1.20$  g/ml and showed fingerprint Raman vibrations at 1163 and 1528  $\text{cm}^{-1}$  for SA, and 1129  
729 and 1524  $\text{cm}^{-1}$  for GBS. Each preparation of MLBs underwent a quality check by (i) Agar  
730 plating, (ii) electron microscopy, (iii) DLS (Dynamic Light Scattering) and (iv) Raman  
731 spectroscopy. Despite of the above mentioned quality measurements we cannot exclude the  
732 possibility that some MVs may appear within the MLB fraction or *vice versa*. The protein  
733 contents of the isolated MLBs were determined by a Pierce BCA protein assay kit (Thermo  
734 Scientific), according to the manufacturer's instructions.

### 735 Raman measurement

736 Isolated MLBs were washed with Millipore water and smeared onto a calcium fluoride slide.  
737 For the bacterial measurement SA and GBS were streaked on agar plates and incubated  
738 overnight. A single colony was smeared onto a calcium fluoride slide. Raman spectra were  
739 recorded with an upright micro-Raman set-up (CRM 300, WITec GmbH, Germany) equipped  
740 with a 600 g/mm grating and a deep depletion CCD camera (DU401A BV-532, ANDOR,  
741 1024 x 127 pixels) cooled down to -60°C. Samples were excited through a Nikon 100x  
742 objective (NA 0.8) using an excitation wavelength of 532 nm Nd-YAG laser (20mW of laser

743 power and exposure time of 1s per spectrum). Single Raman spectra were collected from 300  
744 different sampling positions either in time series mode or single accumulation.

745 Prior to analysis Raman spectra exhibiting only a fluorescence background were removed and  
746 spectral regions, finger print (600 to 1800  $\text{cm}^{-1}$ ) and C-H stretching (2750 to 3100  $\text{cm}^{-1}$ ) of  
747 Raman spectra were further used for analysis. Data pre-processing and statistical analysis  
748 were carried out. Raman spectra were background corrected using the sensitive nonlinear  
749 iterative peak (SNIP) clipping algorithm and vector normalized. Pre-processed Raman spectra  
750 were carefully sorted as per dominating biomolecules allowing the vibrational signatures and  
751 average Raman spectra of proteins, lipids and nucleic acids to be then generated  
752 **(Supplemental Table 1).**

### 753 **Electron microscopy**

754 For negative staining transmission electron microscopy (TEM) carbon-coated EM-grids (400  
755 meshes, Quantifoil, Großlöbichau, Germany) were hydrophilized by glow discharging at low  
756 pressure in air. 20  $\mu\text{l}$  of MLB or OMV solution were adsorbed onto the hydrophilic grids for 2  
757 min. The grids were washed twice on drops of distilled water and stained on a drop of 2%  
758 uranyl acetate in distilled water.

759 For freeze-fracture transmission electron microscopy (FEM) aliquots of cell suspension or  
760 isolated lipid fractions were enclosed between two 0.1-mm-thick copper profiles as used for  
761 the sandwich double-replica technique. The sandwiches were physically fixed by rapid plunge  
762 freezing in a liquid ethane/propane mixture, cooled by liquid nitrogen. Freeze-fracturing was  
763 performed at  $-150^{\circ}\text{C}$  in a BAF400T freeze-fracture unit (BAL-TEC, Lichtenstein) using a  
764 double-replica stage. The fractured samples were shadowed with 2 nm Pt/C (platinum/carbon)  
765 at an angle of  $35^{\circ}$ , followed by perpendicular evaporation of a 15-20 nm thick carbon layer.  
766 The evaporation of Pt/C was controlled by a thin-layer quartz crystal monitor; the thickness of  
767 the carbon layer was controlled optically. The obtained freeze-fracture replicas were  
768 transferred to a “cleaning solution” (commercial sodium hypochlorite containing 12% active  
769  $\text{Cl}_2$ ) for 30 min at  $45^{\circ}\text{C}$ . Then, the replicas were washed four times in distilled water and  
770 transferred onto Formvar-coated grids for examination under a transmission electron  
771 microscope. The negative staining and freeze-fracture samples were both imaged in a Zeiss  
772 EM902A electron microscope (Carl Zeiss AG, Oberkochen, Germany) operated at 80 kV  
773 accelerating voltage, and images were recorded with a 1k (1024 x 1024) FastScan-CCD-

774 camera (CCD-camera and acquisition software EMMANU4 v 4.00.9.17, TVIPS, Munich,  
775 Germany).

776 For scanning electron microscopy (SEM) aliquots of cell suspension were fixed in 2.5%  
777 glutaraldehyde in cacodylic acid buffer (100 mM, pH 7.2) for 1 h. In order to avoid lipid  
778 extraction, dehydration by ethanol series and critical point drying steps were omitted and  
779 drops of glutaraldehyde fixed cell suspensions were air-dried on glass cover slips. The glass  
780 cover slips were mounted on aluminium sample holders and gold sputter coated (layer  
781 thickness 20 nm) in a Compact Coating Unit CCU-010 (Savematic GmbH, Bad Ragaz,  
782 Switzerland). The samples were examined in a Zeiss LEO 1530 SEM (Carl Zeiss AG,  
783 Oberkochen, Germany) at 8 kV acceleration voltages and a working distance of 3 mm using  
784 an InLense secondary electron detector.

### 785 **Dynamic light scattering**

786 Size distribution and varying diameters of the isolated MLBs and MVs were measured using  
787 Zeta sizer nano series. The diluted MLBs and MVs samples of SA were measured at 25°C for  
788 size. Continuous measurement from 15°C to 60°C with the interval of 5°C was performed for  
789 the phase transition experiment.

### 790 **LC-MS of staphyloxanthin type of lipids in MVs and MLBs**

791 The derivatives of staphyloxanthin were detected with LC-MS from MVs, MLBs and SA  
792 bacteria. Due to the light sensitivity of staphyloxanthin derivatives, all the extraction  
793 processes are performed in the dark condition or under the protection of aluminum foil.  
794 Bacterial pellet of SA grown until the late logarithmic phase was first extracted by 50 mL  
795 EtOH, and ultrasonicated for 20 min until the pellet was nearly colorless and all the pigments  
796 were extracted in EtOH. After centrifugation at 8000 rpm for 10 min, the EtOH extract was  
797 collected, filtrated, and finally concentrated under reduced vacuum until completely dried.  
798 The EtOH extract was further separated by solvent extraction with CHCl<sub>3</sub>: MeOH: H<sub>2</sub>O 2:2:1  
799 (v/v/v) and thorough mixing by vortex. After centrifugation, two layers were clearly separated  
800 and the bottom layer was collected as a lipid extract and concentrated under reduced vacuum.  
801 The lipid extract was suspended into MeCN to a concentration of 1 mg/mL. After  
802 centrifugation, the clear supernatant was submitted to Shimadzu UHPLC-MS with the linear  
803 gradient: 0-1 min, 10% B; 1-7 min, 10%-100% B; 7-10 min, 100% B (A: dd H<sub>2</sub>O with 0.1%  
804 formic acid; B: MeCN with 0.1% formic acid) with a flow rate of 0.7 mL/min. 5 µL sample  
805 solution was injected into UHPLC-MS for analysis.

806 MVs and MLBs were prepared from the above protocol and suspended into 25  $\mu$ L H<sub>2</sub>O, and  
807 then added into 25  $\mu$ L MeOH, and ultra sonicated for 10 min. After centrifugation at 13000  
808 rpm for 10 min at room temperature, the supernatant was transferred into brown HPLC vials  
809 and directly submitted to Shimadzu UHPLC-MS using the same procedure as described  
810 above. In the meantime, metabolite analysis was carried out on Thermo QExactive Plus  
811 HESI-HRMS equipped with a Luna Omega C18 column (100 x 2.1 mm, particle size 1.6  $\mu$ m,  
812 pore diameter 100 Å, Phenomenex) preceded by a Security Guard™ ULTRA guard cartridge  
813 (2 x 2.1 mm, Phenomenex) with the linear gradient: 0-0.5 min, 70% B; 0.5-17 min, 70%-97%  
814 B; 17-22 min, 97% B (A: dd H<sub>2</sub>O with 0.1% formic acid; B: MeCN with 0.1% formic acid)  
815 with a flow rate of 0.3 mL/min. The column oven was set to 40 °C. 5  $\mu$ l of the sample were  
816 submitted for analysis and metabolite separation was followed by a data-dependent MS/MS  
817 analysis in positive (MS<sup>1</sup> and MS<sup>2</sup>) ionization mode. The gas flow rates were set to 35 and 10  
818 for the sheath and auxiliary gases, respectively. The capillary and probe heater temperatures  
819 were 340°C and 200°C, respectively. The spray voltages were 4 kV for the positive ionization  
820 modes. S-lens RF level was set to 50. MS<sup>1</sup> had the resolving power set to 70,000 FWHM at  
821  $m/z$  200, scan range to  $m/z$  150 – 2,000; injection time to 100 ms; and AGC to 3e6. The ten  
822 most intense ions were selected for MS<sup>2</sup> with a scan rate of 12 Hz. Resolving power was  
823 17,500 FWHM at  $m/z$  200, AGC target was 1e5, and injection time was 50 ms.  
824 Fragmentations were performed at 28 NCE (normalized collision energy). Data analysis was  
825 performed with Thermo XCalibur software (Thermo Scientific).

#### 826 **LC-MS of c-di-AMP and it's derivatives in MLBs**

827 Ultra-high performance liquid chromatography coupled with high resolution mass  
828 spectrometry was carried out using a THERMO (Bremen, Germany) UltiMate HPG-3400 RS  
829 binary pump, WPS-3000 auto sampler set to 10°C and equipped with a 25  $\mu$ L injection  
830 syringe and a 100  $\mu$ L sample loop. The column was kept at 25°C within the TCC-3200  
831 column compartment. A PHENOMENEX® (Aschaffenburg, Germany) Hydro-RP (80 Å pore  
832 size, 150 × 2 mm; 4  $\mu$ m particle size) Chromatography column was used (**Supplemental Table**  
833 **3**) at a constant flow rate of 0.4 mL/min. Eluent A was water, with 2% acetonitrile and 0.1%  
834 formic acid. Eluent B was pure acetonitrile. For each sample 5  $\mu$ L were injected prior to  
835 dilution with 10  $\mu$ L UPLC-grade water.

836 Mass spectra were recorded with THERMO QExactive plus an Orbitrap mass spectrometer  
837 coupled to a heated electrospray source (HESI). Column flow was switched at 0.5 min from  
838 waste to the MS and at 11.5 min again back to the waste, to prevent source contamination. For

839 monitoring two full scan modes were selected with the following parameters. Polarity:  
840 positive; scan range: 100 to 1500  $m/z$ ; resolution: 70,000; AGC target:  $3 \times 10^6$ ; maximum IT:  
841 200 ms. General settings: sheath gas flow rate: 60; auxiliary gas flow rate 20; sweep gas flow  
842 rate: 5; spray voltage: 3.0 kV; capillary temperature: 360°C; S-lens RF level: 50; auxiliary gas  
843 heater temperature: 400°C; acquisition time frame: 0.5 - 11.5 min. For negative mode all  
844 values were kept instead at spray voltage set to 3.3 kV.

845 Presence of pApA was confirmed based on their  $[M-2H+Na]^-$  and c-di-AMP based on  
846  $[M-H]^-$ ; respectively using their exact masses and a 10 ppm mass window. Presence was  
847 further verified by at least two of additionally occurring ions ( $[M-2H+Na]^-$ ;  $[M-H]^-$ ;  
848  $[M+H]^+$ ;  $[M+Na]^+$ ;  $[M-H+2Na]^+$  ) within a retention time range of  $\pm 0.2$  min comparing to  
849 the authentic standards. Peak detection and integration were carried out using the THERMO  
850 Xcalibur™ 3.0.63 software.

#### 851 **Purification of 4,4'-diaponeurosporenoic acid and staphyloxanthin from *S. aureus***

852 NMR measurements were performed on a Bruker AVANCE III 600 MHz spectrometer,  
853 equipped with a Bruker Cryoplatfrom. Chemical shifts are reported in parts per million (ppm)  
854 relative to the solvent residual peak of  $CDCl_3$  ( $^1H$ : 7.26 ppm, singlet;  $^{13}C$ : 77.16 ppm, triplet).  
855 LC-ESI-HRMS measurements were carried out on an Accela UPLC system (Thermo  
856 Scientific) coupled with a Accucore C18 column (100 x 2.1 mm, particle size 2.6  $\mu m$ )  
857 combined with a Q-Exactive mass spectrometer (Thermo Scientific) equipped with an  
858 electrospray ion (ESI) source. UHPLC-MS measurements were performed on a Shimadzu  
859 LCMS-2020 system equipped with single quadruple mass spectrometer using a Phenomenex  
860 Kinetex C18 column (50 x 2.1 mm, particle size 1.7  $\mu m$ , pore diameter 100 Å). The column  
861 oven was set to 40°C; the scan range of MS was set to  $m/z$  150 to 2,000 with a scan speed of  
862 10,000 u/s and event time of 0.25 s under positive and negative mode. DL temperature was set  
863 to 250°C with an interface temperature of 350°C and a heat block of 400°C. The nebulizing  
864 gas flow was set to 1.5 L/min and dry gas flow to 15 L/min. Semi-preparative HPLC was  
865 performed on a Shimadzu HPLC system using a Phenomenex Luna Phenyl Hexyl 250 x 10  
866 mm column (particle size 5  $\mu m$ , pore diameter 100 Å). Solid phase extraction was carried out  
867 using Chromabond SiOH cartridges filled with 2 g of unmodified silica gel (Macherey-Nagel,  
868 Germany). Chemicals: Methanol (VWR, Germany); water for analytical and preparative  
869 HPLC (Millipore, Germany), formic acid (Carl Roth, Germany); acetonitrile (VWR as LC-  
870 MS grade), media ingredients (Carl Roth, Germany).

871 SA was cultured overnight in THY medium (37°C, 160 rpm). The cell pellet was separated  
872 from the supernatant by centrifugation at 4000 rpm at 4°C. The cell pellet was extracted twice  
873 using 100 mL ethanol at 37°C for 2 h. The EtOH extract was combined and concentrated  
874 under reduced pressure. The dried extract was partitioned using 100 mL 1.7 M NaCl and 100  
875 mL ethyl acetate three times. The EtOAc phase was combined, dried over MgSO<sub>4</sub> and  
876 concentrated under reduced pressure conditions. In total, 189 mg crude extract was obtained  
877 from 10 L liquid culture. The crude extract was separated using a SiOH cartridge (2 g, twice)  
878 and eluted by a step gradient of cyclohexane and EtOAc (100% cyclohexane, 5:1, 2:1, 1:1,  
879 1:2, 100% EtOAc and 100% MeOH). The fraction resulting in an orange band was collected  
880 from the elution of cyclohexane: EtOAc 5:1 (v/v) (Fraction 2, 36.22 mg) and 1:1 (v/v)  
881 (Fraction 5, 4.58 mg).

882 Fr. 2 was further separated on RP-C18 F254s preparative TLC plates (Merck) using a  
883 methanol-acetonitrile (1:1, v/v) mixture. The pigment band with an R<sub>f</sub> value of 0.61 was  
884 scratched from the preparative TLC plates, extracted by 1 x 3 mL EtOAc, and concentrated  
885 under reduced pressure to yield Fr. 2.1, (4.29 mg). Fr. 2.1 was subjected to purification by  
886 semi-preparative HPLC on Phenomenex Phenyl-Hexyl column 250 x 10 mm, 100 Å. The  
887 fraction containing 4,4'-diaponeurosporenoic acid (**1**, 0.79 mg, *t<sub>R</sub>* = 13.92 min) was obtained  
888 using a gradient of 0-5 min, 90% MeCN/10% H<sub>2</sub>O containing 0.1% formic acid; 5-10 min,  
889 90%-100% MeCN; 10-20 min, 100% MeCN, under a flow rate of 2.0 mL/min. Similarly, Fr.  
890 5 was further separated with a pigment band with an R<sub>f</sub> value of 0.55 scratched from the  
891 preparative TLC plates and extracted three times with 1 mL EtOAc. The EtOAc extract of the  
892 pigment band (Fr. 5.1, 1.6 mg) was concentrated under reduced pressure and subjected to  
893 purification by semi-preparative HPLC on a Phenomenex Phenyl-Hexyl column 250 x 10  
894 mm, 100 Å. Staphyloxanthin (**2**, 0.1 mg, *t<sub>R</sub>* = 19.54 min) was obtained by semi-preparative  
895 HPLC under a gradient of 0-5 min, 90% MeCN/10% H<sub>2</sub>O containing 0.1% formic acid; 5-10  
896 min, 90%-100% MeCN; 10-20 min, 100% MeCN, under a flow rate of 2.0 mL/min.

897 The sample was analysed using a Shimadzu UHPLC-MS (gradient: 0–1 min, 70% B; 1-5 min,  
898 70%-100% B; 5-7 min, 100% B (A: dd H<sub>2</sub>O with 0.1% formic acid; B: MeCN with 0.1%  
899 formic acid) with a flow rate of 1.0 mL/min. 1 µL sample solution was injected into the  
900 UHPLC-MS for analysis.

901 **RNA extraction and quality control**

902 RNA was extracted from GBS, SA and MLBs from GBS and SA, respectively using a Qiagen  
903 RNA extraction kit with some modifications. Briefly, samples were homogenized in Qiazol  
904 (Qiagen) for 1 min with a minute of cool-down step using a homogenizer. The total RNA  
905 from each sample was collected into two fractions using two column methods. Big RNA  
906 (BRNA), which contains more than 200 nucleotides, was isolated using total RNA extraction  
907 columns with 1 volume of 70% ethanol followed by washes as described in the Qiagen total  
908 RNA extraction kit instructions. Flow through from the BRNA was collected and mixed with  
909 1.5 volume of 100% ethanol to isolate  $\mu$ RNA which contains RNA shorter than 200  
910 nucleotides. This was followed by 65°C warm buffer washes and elution as mentioned in the  
911 kit. The quantity of extracted RNA for the individual fractions ranged from 0.5  $\mu$ g to 3  $\mu$ g.  
912 The size distribution of the BRNA and  $\mu$ RNA was measured on a bioanalyser (QIAxcel  
913 Advanced systems, Qiagen) following the manufacturer's instructions.

914 **RNA sequencing for wild type *S. aureus* (SA),  $\Delta agr$  mutant and SA MLB**

915  $\mu$ RNA was isolated from SA, SA-MLB and SA- $\Delta agr$  as mentioned in the RNA extraction  
916 protocol. The respective isolated  $\mu$ RNA was quantified with a A260/A280 ratio more than  
917 1.8. RNA integrity was subsequently assessed using Qubit RNA HS assay (ThermoFisher  
918 scientific) with a Qubit fluorometer. Dephosphorylation was performed on the respective  
919  $\mu$ RNA with addition of 5 $\mu$ g to a Quick dephosphorylation kit (New England BioLabs).  
920 Dephosphorylated  $\mu$ RNA was again purified using  $\mu$ RNA isolation columns. The eluted  
921  $\mu$ RNA was quantified again using Qubit RNA HS assay. Libraries were prepared using  
922 smRNA-seq kit (TAKARA) with the input of 1  $\mu$ g  $\mu$ RNA for all three samples with positive  
923 and negative controls. For the library preparation the manufacturer's instructions were  
924 followed. These included polyadenylation and, cDNA synthesis following PCR and clean-up.  
925 cDNA libraries obtained were quantified using a Qubit DNA HS assay with a Qubit  
926 fluorometer. Each library prepared yielded approximately 18-20 ng/ $\mu$ l of cDNA. The pooled  
927 library was sequenced using Illumina dual sided 250 base pair sequencing. Approximately 3  
928 million reads of SA, SA- $\Delta agr$  and SA-MLB  $\mu$ RNA, respectively were obtained covering the  
929 entire  $\mu$ RNA region. Sequenced reads for SA,  $\Delta agr$  and SA-MLB were mapped on reference  
930 sequences of *Staphylococcus aureus* subsp. aureus N315 (accession number: NC\_002745.2)  
931 and *Staphylococcus aureus* subsp. aureus NCTC 8325 (accession number: NC\_007795.1) and  
932 were analysed using SeqMan Pro ArrayStar and GenVision Pro followed by identification of

933 at least 2 fold differentially abundant reads. The reads obtained from rRNA, antisense and  
934 coding regions were eliminated.

### 935 **RNAIII cloning**

936 RNAIII which is 514 bp long was PCR amplified on the genome of *S. aureus* (LS1) with  
937 primers containing either HindIII or EcoRI restriction sites on the 3' or 5' ends of RNAIII  
938 respectively (**Supplemental Table 5**). The digested PCR product of RNAIII was cloned into  
939 pET28a vector. Ligated products were transformed into *E. coli* competent cells. The  
940 transformed bacteria resistant to kanamycin were selected. Colonies from the agar plate were  
941 subjected to plasmid extraction using a Macherey Nagel Plasmid Isolation Kit, according to  
942 the manufacturer's instructions. To confirm the accuracy of the constructs, the recombinant  
943 plasmids were sequenced.

### 944 ***In-vitro*-transcription**

945 Templates for the *in-vitro*-transcription were amplified by PCR from a RNAIII clone using  
946 primers mentioned in **Supplemental Table 5**. *In-vitro*-transcription was carried out using the  
947 Hi-Scribe RNA transcription kit (New England BioLabs). Briefly, 10 mM NTPs, 1× reaction  
948 buffer, 800 ng DNA template and 2 µl HiScribe™ T7 polymerase in 20 µl RNase-free water  
949 with RNase inhibitor was incubated at 37°C for 2h. 2U of DNase treatment was given for 20  
950 min. The RNA transcripts were further precipitated in 100% ethanol with sodium acetate for  
951 16 h at -20°C. The precipitated RNA was further purified using RNA purification columns  
952 following the manufacturer's instructions (Qiagen). The RNA columns were washed twice  
953 with warm buffer heated at 65°C. Quality control of IVT RNA was performed using QIAxcel  
954 capillary electrophoresis fragment analysis protocol to ensure lack of poor transcription  
955 template contamination and degraded RNA. Assurance of RNA purity and lack of  
956 contaminating DNA was further affirmed in the cellular assays using WT and cGAS deficient  
957 THP1 macrophages which can differentiate DNA dependent responses.

### 958 **Human blood and tissue sampling**

959 Samples were collected in a clinical cohort study performed on the multidisciplinary intensive  
960 care unit (ICU) of Jena University Hospital (77). All patients admitted to the ICU were  
961 screened within 2h of admission for evidence of a systemic inflammatory response syndrome  
962 (SIRS) resulting from possible or proven infection. When sepsis was diagnosed, all adult  
963 patients with organ dysfunction according to the old criteria for sepsis (Sepsis-2) were eligible  
964 for study inclusion. All samples are thus in accordance with the new Sepsis-3 definition (67).



965 Blood samples were collected within 24 h after clinical diagnosis. After approval by the local  
966 ethics committee (IDs: 2160-11/07, 2712-12/09 and 3824-11/12), all patients or legal  
967 surrogates gave informed consent for genetic analyses, blood collection and data evaluation.  
968 Peripheral blood mononuclear cells (PBMCs) were isolated from heparinized peripheral blood  
969 from consenting healthy volunteers. PBMCs were isolated with density gradient  
970 centrifugation using Bicol separating solution and subjected to short erythrocyte lysis.  
971 Macrophages were differentiated from the isolated PBMCs with recombinant human M-CSF  
972 (10 ng/ml). On day 4, the cytokine-supplemented medium was refreshed. Macrophages were  
973 plated onto fresh 96 well plates in complete medium and then stimulated.

#### 974 **Cell culture**

975 THP1 wild type, *CASP4*<sup>-/-</sup>, *CASP1*<sup>-/-</sup>, *STING*<sup>-/-</sup>, *cGAS*<sup>-/-</sup>, *ASC*<sup>-/-</sup> and *STING*<sup>R232</sup> expressing  
976 *STING*<sup>-/-</sup> cells were cultivated in RPMI Medium 1640 supplemented with L-glutamine,  
977 sodium pyruvate, 10% (v/v) FCS (life technologies) and 100 U/ml of penicillin streptomycin.  
978 Cells were stimulated in fresh medium as indicated. THP1 *CASP4*<sup>-/-</sup>, *CASP1*<sup>-/-</sup>, *ASC*<sup>-/-</sup> cells  
979 with caspase-4, caspase-1 and ASC gene deletion were reported previously and genotypically  
980 and phenotypically were confirmed by genome sequencing and Western blot (36). THP1  
981 *STING*<sup>-/-</sup>, *cGAS*<sup>-/-</sup>, *STING*<sup>R232</sup> expressing *STING*<sup>-/-</sup> were purchased from Invivogen. The  
982 deletion of *STING* and *cGAS* gene was confirmed with Western blot and sequencing (data  
983 not shown). Cells were differentiated into MΦ overnight using 100 ng/ml phorbol 12-  
984 myristate 13 acetate (PMA) then washed with PBS and used for experiments. All cell lines  
985 and respective gene targeted clones were tested as free from mycoplasma.

#### 986 **Cell stimulation**

987 THP1 wild type, *CASP4*<sup>-/-</sup>, *CASP1*<sup>-/-</sup>, *STING*<sup>-/-</sup>, *cGAS*<sup>-/-</sup>, *ASC*<sup>-/-</sup> and *STING*<sup>R232</sup> MΦ cells were  
988 used to access the cytosolic inflammasome and cell death responses. Unless otherwise  
989 indicated cells were primed with 400 ng/ml of Pam3CSK4 (Invivogen) when LPS was the  
990 second stimulus or with 100 ng/ml LPS (Invivogen) for 3 h.

991 For MLB stimulation: THP1 wild type, *CASP4*<sup>-/-</sup>, *CASP1*<sup>-/-</sup>, *ASC*<sup>-/-</sup>, *STING*<sup>-/-</sup>, and *cGAS*<sup>-/-</sup> MΦ  
992 were washed with PBS and stimulated with 10 µg/ml MLBs. For control purposes cells were  
993 stimulated with cytosolic 1 µg LPS using lipofectamine or nigericin (6.7 µM) (InvivoGen,  
994 tlr1-nig). 1% triton X100 was used as a lysis control in cell death assays (37). Cytosolic RNA  
995 with lipid: THP1 MΦ were stimulated with RNA (5, 2.5, 0.1 µg/ml) micelled with 0.125 µM  
996 of isolated lipid. In experiments with lipid stimulations, the respective solvent control was

997 used which was then normalized. IVT RNA stimulations: THP1 wild type, *STING*<sup>-/-</sup> and  
998 *cGAS*<sup>-/-</sup> MΦ were stimulated with *in-vitro*-transcribed RNA (5, 2.5 μg/ml) using  
999 lipofectamine. For bacterial infections: cells were infected for 1 h with bacteria grown to a  
1000 late log phase *S. aureus*, mutant *Δagr* with MOI 10 and GBS with MOI 20 unless mentioned  
1001 otherwise. The medium was replaced with gentamicin (100 μg/ml) and, penicillin (250  
1002 UI/ml)/streptomycin (250 mg/ml) containing medium after 1 h of infection. For naftifine  
1003 (Medice) inhibited bacterial infections, bacteria were grown overnight in medium with  
1004 empirically-optimized concentrations of naftifine (50 μM). The pelleted SA and GBS were  
1005 characterized for staphyloxanthin biosynthetic pathway inhibition by Raman spectroscopy and  
1006 used for infection with MOI 10 and MOI 20 respectively. μRNA was isolated from the  
1007 naftifine-inhibited bacteria and used for stimulations tests. Experiments with small molecule  
1008 inhibitors: THP1 MΦ were pre-treated with MCC950 (5 μM, 10 μM) (44), Dynasore (150,  
1009 100 μM) (Enzo), KCL (60 mM, 45 mM, 75 mM), H-151 (100 μM, 50 μM, 10 μM)  
1010 (ProbeChem) for 1 h prior to the stimulations. Experiments with RNase A, DNase I: THP1  
1011 MΦ were pre-treated cytosolically (+LF) with increasing concentrations of RNase A, DNase I  
1012 (100 ng/ml, 50 ng/ml, 10 ng/ml) for 2 h washed and then infected with SA and MLBs. Heat  
1013 inactivated RNase A was used as a control for these experiments. Supernatants were collected  
1014 after 16 hr for IL-1β production measurement.

#### 1015 **ELISA and LDH**

1016 IL-1β and TNF-α production were measured with ELISA (R&D systems) and cell death was  
1017 measured with LDH (TAKARA clonotech). This was performed in the supernatant collected  
1018 after 16 h of stimulation. Relative LDH release was calculated as LDH release (% cell death)  
1019 =100\*((measurement-unstimulated cells)/ (lysis control-unstimulated cells)).

#### 1020 **Western blot and STING dimerization assay**

1021 STING dimerization was assayed under semi-native conditions. Five hundred thousand THP1  
1022 MΦ after stimulation with μRNA of *S. aureus* (SA), *Δagr* and *in-vitro*-transcribed RNAIII (3  
1023 μg ml<sup>-1</sup>, 1 μg ml<sup>-1</sup>) were lysed in 30 μl of 1X cell lysis buffer (Cell Signaling) supplemented  
1024 with 1X protease cocktail inhibitor (Roche) and 1X sample buffer. Whole cell lysate were  
1025 sonicated for 7 min with at intensity before loading onto gel without heating. Separation was  
1026 done using 4-12% SDS-PAGE gel electrophoresis were each gel was run initially for 10 min  
1027 at 70 V, and then at 120 V for 1 h 30 min.

1028 GSDMD cleavage in human plasma of *S. aureus* sepsis patients and ICU controls was assayed  
1029 through Western blot. 1  $\mu$ g plasma with 1X sample buffer was heated at 95°C for 5 min  
1030 before loading on the gel. Separation was performed by 4-12% SDS-PAGE gel  
1031 electrophoresis with each gel run at 70 V.

1032 Proteins were blotted onto PVDF membrane, blocked in bovine serum albumin for anti-  
1033 GSDMD and in skim-milk for anti-STING, respectively with indicated primary and  
1034 secondary antibodies. Chemiluminescent signals were recorded with a CCD camera.  
1035 Antibodies used: STING (R&D systems), GAPDH (Thermo Fisher), GSDMD (Proteintech).

#### 1036 **Binding assay for $\mu$ RNA and CDN**

1037 4  $\mu$ g  $\mu$ RNA or 4  $\mu$ g Big RNA was prepared in buffer (20 mM tris-HCL pH 8.4, 50 mM KCl  
1038 0.1 mM MgCl<sub>2</sub>) were heated at 80°C for 10 min (reaction A). 16  $\mu$ M biotin-c-di-AMP and  
1039 streptavidin-HRP was prepared in buffer (20 mM tris-HCL pH 8.4, 50 mM KCl 0.1 mM  
1040 MgCl<sub>2</sub>) and heated at 37°C for 30 min (reaction B). Reaction B was then added to reaction A  
1041 and stepwise incubated for 37°C for 10 min followed by 30°C for 10 min, 25°C for 10 min  
1042 and, finally, 4°C for 5 min.

1043 To the above reaction 300  $\mu$ l cold water and 1.5 V 100% ethanol were added and eluted in 50  
1044  $\mu$ l water through a  $\mu$ RNA extraction column according to the manufacturer's instructions.  
1045 Following this, the eluted RNA was diluted with TMB substrate (1:1) in a 96 well plate. The  
1046 reaction was stopped with 2N H<sub>2</sub>SO<sub>4</sub> and absorbance measured at 450 nm. Diagrammatic  
1047 representation of the method is shown in **Fig. 4H**. A similar procedure was performed for  
1048  $\mu$ RNA from SA and mutant  $\Delta$ *agr* and *in-vitro*-transcribed RNAIII as depicted in **Fig. 4P**.

#### 1049 **LC-MS for binding of $\mu$ RNA and CDN**

1050 4  $\mu$ g  $\mu$ RNA of SA,  $\Delta$ *agr* and *in-vitro*-transcribed RNAIII were prepared in buffer (20 mM  
1051 tris-HCL pH 8.4, 50 mM KCl 0.1 mM MgCl<sub>2</sub>) heated at 80°C for 10 min (reaction A). 16  $\mu$ M  
1052 biotin c-di-AMP and streptavidin-HRP was prepared in buffer (20 mM tris-HCL pH 8.4, 50  
1053 mM KCl 0.1 mM MgCl<sub>2</sub>) and heated at 37°C for 30 min (reaction B). Reaction B was then  
1054 added to reaction A and stepwise incubated for 37°C for 10 min then 30°C for 10 min, 25°C  
1055 for 10 min and, finally, 4°C for 5 min. To the above reaction 300  $\mu$ l cold water and 1.5  
1056 volume of 100% ethanol were added and eluted in 50  $\mu$ l water through a RNA extraction  
1057 column according to the manufacturer's instructions. Following this the eluted RNA was  
1058 diluted 1:100, 1:50 and 1:10 with RNase free water. The diluted RNA was subjected to ultra-  
1059 high performance liquid chromatography coupled with high resolution mass spectrometry

1060 using THERMO (Bremen, Germany). The detailed procedure of LC-MS is described in the  
1061 section entitled “LC-MS of c-di-AMP and derivatives in MLBs”. One of the three  
1062 independent experiments is shown.

### 1063 **Spinach fluorescence assay**

1064 The small molecule binding aptamer used in the study had been previously characterized (62).  
1065 The spinach DNA primers were amplified by PCR up to 25 cycles with DNA polymerase.  
1066 The resulting DNA was gel purified confirmed by sequencing and subsequently *in-vitro*-  
1067 transcribed using T7 RNA polymerase. The RNA was further precipitated and column-  
1068 purified with warm wash buffer and dissolved in spinach reaction buffer (40 mM HEPES, 125  
1069 mM KCL, 3 mM MgCl<sub>2</sub>). The RNA samples were heated at 70°C for 3 min, and then cooled  
1070 down at room temperature over 5 min. The concentration of RNA was adjusted to 100 nM for  
1071 each measurement. The concentration of CDN (c-di-AMP) was 0.1 pM-10 nM and DFHBI  
1072 (3,5-Difluoro-4-hydroxybenzylidene) was added to a final concentration of 10 μM. Samples  
1073 were incubated at 37°C in a black 96 well microtiter plate until equilibrium was reached.  
1074 Measured were then made with a Tecan infinite plate reader at excitation 460 nm and  
1075 emission 500 nm. Background fluorescence was subtracted and data were normalized.  
1076 Diagrammatic representation is shown in **Fig. 5G**.

### 1077 **Confocal microscopy**

1078 For visualization of STING and LAMP-1 co-localization following transfection with μRNA  
1079 (1 μg ml<sup>-1</sup>) from SA, mutant *Δagr* bacteria and infections with GBS and *S. aureus* wild type,  
1080 300,000 cells on coverslips were fixed with ice-cold methanol for 15 min and permeabilized  
1081 with saponin based permeabilization buffer (Invitrogen). Cells were stained with antibodies  
1082 directed against STING (R&D systems) and LAMP-1 (Abcam). Secondary antibodies  
1083 included Alexa Flour® 488 and Alexa flour® 647 were used. Images were acquired using a  
1084 Zeiss LSM 780 confocal microscope using a 63X lens. Quantification of the co-localization  
1085 (%) was calculated by ((number of co-localized yellow speckles / number of STING (red)  
1086 speckles) \*100).

### 1087 **Inhibition of staphyloxanthin biosynthetic pathway**

1088 For inhibition of staphyloxanthin an overnight culture of GBS was inoculated onto the plate  
1089 as a lawn culture. After drying, increasing concentrations of naftifine (200 ng/ml, 100 ng/ml,  
1090 10 ng/ml) disc filter paper (6 mm diameter, Whatmann filter paper no. 2) were added. A paper

1091 disc with PBS was used as a control. The plates were incubated overnight at 37°C and the  
1092 zone of decolorization analysed.

### 1093 **Statistical analysis**

1094 Data were analysed using Graph Pad Prism software. If indicated, data were analysed for  
1095 statistically significant differences using paired Students's *t*-test for two conditions or groups.  
1096 The quantification of the microscopic STING+LAMP1 structures undertaken using a Mann  
1097 Whitney test. P values of \* $< 0.05$ , \*\* $p < 0.01$ , \*\*\* $p < 0.001$ , and  $< 0.0001$  were considered  
1098 significant.

### 1099 **Acknowledgements**

1100 The authors thank Prof. Viet Hornung for providing some of the CRISPR cell lines used in  
1101 this study. We thank Prof. Ingrid Hilger for making available the zetasizer nano series  
1102 instrument. We thank Prof. Vijay A.K. Rathinam and Prof. Reinhard Wetzker for critical  
1103 assessment of the manuscript. We thank the DFG for funding of the UHPLC-Q-Exactive plus  
1104 mass spectrometer system within the CRC 1127 (ChemBioSys). This work was mainly  
1105 supported by the Federal Ministry of Education and Research, Germany (FKZ: 01EO1502,  
1106 FKZ: 01EO1002) and partly by the DFG-funded Collaborative Research Centre PolyTarget  
1107 (SFB 1278, Project C03).

### 1108 **Authors contributions**

1109 SND performed or assisted in majority of experiments and analysed data; MG, BG assisted  
1110 with the experiments and data analysis; SND, SDD wrote the manuscript; MW performed  
1111 electron microscopy and data analysis; HG, NU and CB performed HPLC/MS/NMR  
1112 experiments and data analysis; AR performed Raman spectroscopy and data analysis; UN and  
1113 JP provided resources and technical help in Raman spectroscopy; MB, CS and TB provided  
1114 human specimens, clinical data; BL and LPNT provided patient isolates, bacterial mutants  
1115 and clinical data; MB, MS helped in experimental design, clinical data analysis and writing of  
1116 the manuscript; SDD and MB obtained funding; SDD conceived, designed, and supervised  
1117 this study, interpreted data, provided guidance with experimental design. All authors critically  
1118 revised the manuscript for important intellectual content.

1119 **Disclosures:** All authors declare no conflict of interest.

1120 **REFERENCES**

- 1121
- 1122 1. Medzhitov R, Janeway C, Jr.: **Innate immune recognition: mechanisms and**  
1123 **pathways.** *Immunological reviews* 2000, **173**:89-97.
- 1124 2. Broz P, Dixit VM: **Inflammasomes: mechanism of assembly, regulation and**  
1125 **signalling.** *Nature reviews Immunology* 2016, **16**(7):407-420.
- 1126 3. Rathinam VA, Vanaja SK, Fitzgerald KA: **Regulation of inflammasome**  
1127 **signaling.** *Nature immunology* 2012, **13**(4):333-342.
- 1128 4. Latz E, Xiao TS, Stutz A: **Activation and regulation of the inflammasomes.**  
1129 *Nature reviews Immunology* 2013, **13**(6):397-411.
- 1130 5. Ishikawa H, Barber GN: **STING is an endoplasmic reticulum adaptor that**  
1131 **facilitates innate immune signalling.** *Nature* 2008, **455**(7213):674-678.
- 1132 6. Sun L, Wu J, Du F, Chen X, Chen ZJ: **Cyclic GMP-AMP synthase is a cytosolic**  
1133 **DNA sensor that activates the type I interferon pathway.** *Science* 2013,  
1134 **339**(6121):786-791.
- 1135 7. Munoz-Planillo R, Kuffa P, Martinez-Colon G, Smith BL, Rajendiran TM, Nunez  
1136 G: **K(+) efflux is the common trigger of NLRP3 inflammasome activation by**  
1137 **bacterial toxins and particulate matter.** *Immunity* 2013, **38**(6):1142-1153.
- 1138 8. Craven RR, Gao X, Allen IC, Gris D, Bubeck Wardenburg J, McElvania-Tekippe  
1139 E, Ting JP, Duncan JA: **Staphylococcus aureus alpha-hemolysin activates the**  
1140 **NLRP3-inflammasome in human and mouse monocytic cells.** *PloS one* 2009,  
1141 **4**(10):e7446.
- 1142 9. Gaidt MM, Ebert TS, Chauhan D, Ramshorn K, Pinci F, Zuber S, O'Duill F,  
1143 Schmid-Burgk JL, Hoss F, Buhmann R *et al*: **The DNA Inflammasome in**  
1144 **Human Myeloid Cells Is Initiated by a STING-Cell Death Program Upstream**  
1145 **of NLRP3.** *Cell* 2017, **171**(5):1110-1124 e1118.
- 1146 10. McWhirter SM, Barbalat R, Monroe KM, Fontana MF, Hyodo M, Joncker NT,  
1147 Ishii KJ, Akira S, Colonna M, Chen ZJ *et al*: **A host type I interferon response is**  
1148 **induced by cytosolic sensing of the bacterial second messenger cyclic-di-GMP.**  
1149 *J Exp Med* 2009, **206**(9):1899-1911.
- 1150 11. Jin L, Hill KK, Filak H, Mogan J, Knowles H, Zhang B, Perraud AL, Cambier JC,  
1151 Lenz LL: **MPYS is required for IFN response factor 3 activation and type I**  
1152 **IFN production in the response of cultured phagocytes to bacterial second**  
1153 **messengers cyclic-di-AMP and cyclic-di-GMP.** *J Immunol* 2011, **187**(5):2595-  
1154 2601.
- 1155 12. Sauer JD, Sotelo-Troha K, von Moltke J, Monroe KM, Rae CS, Brubaker SW,  
1156 Hyodo M, Hayakawa Y, Woodward JJ, Portnoy DA *et al*: **The N-ethyl-N-**  
1157 **nitrosourea-induced Goldenticket mouse mutant reveals an essential function**  
1158 **of Sting in the in vivo interferon response to Listeria monocytogenes and**  
1159 **cyclic dinucleotides.** *Infect Immun* 2011, **79**(2):688-694.

- 1160 13. Barker JR, Koestler BJ, Carpenter VK, Burdette DL, Waters CM, Vance RE,  
1161 Valdivia RH: **STING-dependent recognition of cyclic di-AMP mediates type I**  
1162 **interferon responses during Chlamydia trachomatis infection.** *mBio* 2013,  
1163 4(3):e00018-00013.
- 1164 14. Woodward JJ, Iavarone AT, Portnoy DA: **c-di-AMP secreted by intracellular**  
1165 **Listeria monocytogenes activates a host type I interferon response.** *Science*  
1166 2010, **328**(5986):1703-1705.
- 1167 15. Burdette DL, Monroe KM, Sotelo-Troha K, Iwig JS, Eckert B, Hyodo M,  
1168 Hayakawa Y, Vance RE: **STING is a direct innate immune sensor of cyclic di-**  
1169 **GMP.** *Nature* 2011, **478**(7370):515-518.
- 1170 16. Andrade WA, Firon A, Schmidt T, Hornung V, Fitzgerald KA, Kurt-Jones EA,  
1171 Trieu-Cuot P, Golenbock DT, Kaminski PA: **Group B Streptococcus Degrades**  
1172 **Cyclic-di-AMP to Modulate STING-Dependent Type I Interferon Production.**  
1173 *Cell host & microbe* 2016, **20**(1):49-59.
- 1174 17. Landwehr-Kenzel S, Henneke P: **Interaction of Streptococcus agalactiae and**  
1175 **Cellular Innate Immunity in Colonization and Disease.** *Frontiers in*  
1176 *immunology* 2014, **5**:519.
- 1177 18. Kong C, Neoh HM, Nathan S: **Targeting Staphylococcus aureus Toxins: A**  
1178 **Potential form of Anti-Virulence Therapy.** *Toxins* 2016, **8**(3).
- 1179 19. Lamy MC, Zouine M, Fert J, Vergassola M, Couve E, Pellegrini E, Glaser P, Kunst  
1180 F, Msadek T, Trieu-Cuot P *et al*: **CovS/CovR of group B streptococcus: a two-**  
1181 **component global regulatory system involved in virulence.** *Molecular*  
1182 *microbiology* 2004, **54**(5):1250-1268.
- 1183 20. Gupta R, Ghosh S, Monks B, DeOliveira RB, Tzeng TC, Kalantari P, Nandy A,  
1184 Bhattacharjee B, Chan J, Ferreira F *et al*: **RNA and beta-hemolysin of group B**  
1185 **Streptococcus induce interleukin-1beta (IL-1beta) by activating NLRP3**  
1186 **inflammasomes in mouse macrophages.** *The Journal of biological chemistry*  
1187 2014, **289**(20):13701-13705.
- 1188 21. Liu GY, Essex A, Buchanan JT, Datta V, Hoffman HM, Bastian JF, Fierer J, Nizet  
1189 V: **Staphylococcus aureus golden pigment impairs neutrophil killing and**  
1190 **promotes virulence through its antioxidant activity.** *The Journal of*  
1191 *experimental medicine* 2005, **202**(2):209-215.
- 1192 22. Kim SH, Lee PC: **Functional expression and extension of staphylococcal**  
1193 **staphyloxanthin biosynthetic pathway in Escherichia coli.** *The Journal of*  
1194 *biological chemistry* 2012, **287**(26):21575-21583.
- 1195 23. Whidbey C, Vornhagen J, Gendrin C, Boldenow E, Samson JM, Doering K, Ngo  
1196 L, Ezekwe EA, Jr., Gundlach JH, Elovitz MA *et al*: **A streptococcal lipid toxin**  
1197 **induces membrane permeabilization and pyroptosis leading to fetal injury.**  
1198 *EMBO molecular medicine* 2015, **7**(4):488-505.
- 1199 24. Novick RP, Geisinger E: **Quorum sensing in staphylococci.** *Annu Rev Genet*  
1200 2008, **42**:541-564.

- 1201 25. Felden B, Vandenesch F, Bouloc P, Romby P: **The Staphylococcus aureus**  
1202 **RNome and its commitment to virulence**. *PLoS Pathog* 2011, **7**(3):e1002006.
- 1203 26. Pelz A, Wieland KP, Putzbach K, Hentschel P, Albert K, Gotz F: **Structure and**  
1204 **biosynthesis of staphyloxanthin from Staphylococcus aureus**. *The Journal of*  
1205 *biological chemistry* 2005, **280**(37):32493-32498.
- 1206 27. Toledo-Arana A, Repoila F, Cossart P: **Small noncoding RNAs controlling**  
1207 **pathogenesis**. *Curr Opin Microbiol* 2007, **10**(2):182-188.
- 1208 28. Deshmukh SD, Muller S, Hese K, Rauch KS, Wennekamp J, Takeuchi O, Akira S,  
1209 Golenbock DT, Henneke P: **NO is a macrophage autonomous modifier of the**  
1210 **cytokine response to streptococcal single-stranded RNA**. *Journal of*  
1211 *immunology* 2012, **188**(2):774-780.
- 1212 29. Deshmukh SD, Kremer B, Freudenberg M, Bauer S, Golenbock DT, Henneke P:  
1213 **Macrophages recognize streptococci through bacterial single-stranded RNA**.  
1214 *EMBO reports* 2011, **12**(1):71-76.
- 1215 30. Sha W, Mitoma H, Hanabuchi S, Bao M, Weng L, Sugimoto N, Liu Y, Zhang Z,  
1216 Zhong J, Sun B *et al*: **Human NLRP3 inflammasome senses multiple types of**  
1217 **bacterial RNAs**. *Proceedings of the National Academy of Sciences of the United*  
1218 *States of America* 2014, **111**(45):16059-16064.
- 1219 31. Sander LE, Davis MJ, Boekschoten MV, Amsen D, Dascher CC, Ryffel B,  
1220 Swanson JA, Muller M, Blander JM: **Detection of prokaryotic mRNA signifies**  
1221 **microbial viability and promotes immunity**. *Nature* 2011, **474**(7351):385-389.
- 1222 32. Ellis TN, Kuehn MJ: **Virulence and immunomodulatory roles of bacterial outer**  
1223 **membrane vesicles**. *Microbiology and molecular biology reviews : MMBR* 2010,  
1224 **74**(1):81-94.
- 1225 33. Mandal M, Breaker RR: **Gene regulation by riboswitches**. *Nature reviews*  
1226 *Molecular cell biology* 2004, **5**(6):451-463.
- 1227 34. Vanaja SK, Russo AJ, Behl B, Banerjee I, Yankova M, Deshmukh SD, Rathinam  
1228 VA: **Bacterial Outer Membrane Vesicles Mediate Cytosolic Localization of**  
1229 **LPS and Caspase-11 Activation**. *Cell* 2016, **165**(5):1106-1119.
- 1230 35. Surve MV, Anil A, Kamath KG, Bhutda S, Sthanam LK, Pradhan A, Srivastava R,  
1231 Basu B, Dutta S, Sen S *et al*: **Membrane Vesicles of Group B Streptococcus**  
1232 **Disrupt Feto-Maternal Barrier Leading to Preterm Birth**. *PLoS pathogens*  
1233 2016, **12**(9):e1005816.
- 1234 36. Gaidt MM, Ebert TS, Chauhan D, Schmidt T, Schmid-Burgk JL, Rapino F,  
1235 Robertson AA, Cooper MA, Graf T, Hornung V: **Human Monocytes Engage an**  
1236 **Alternative Inflammasome Pathway**. *Immunity* 2016, **44**(4):833-846.
- 1237 37. Schmid-Burgk JL, Gaidt MM, Schmidt T, Ebert TS, Bartok E, Hornung V:  
1238 **Caspase-4 mediates non-canonical activation of the NLRP3 inflammasome in**  
1239 **human myeloid cells**. *European journal of immunology* 2015, **45**(10):2911-2917.



- 1240 38. Costa A, Gupta R, Signorino G, Malara A, Cardile F, Biondo C, Midiri A, Galbo  
1241 R, Trieu-Cuot P, Papasergi S *et al*: **Activation of the NLRP3 inflammasome by**  
1242 **group B streptococci**. *Journal of immunology* 2012, **188**(4):1953-1960.
- 1243 39. Kanneganti TD, Ozoren N, Body-Malapel M, Amer A, Park JH, Franchi L,  
1244 Whitfield J, Barchet W, Colonna M, Vandenabeele P *et al*: **Bacterial RNA and**  
1245 **small antiviral compounds activate caspase-1 through cryopyrin/Nalp3**. *Nature*  
1246 2006, **440**(7081):233-236.
- 1247 40. Haag SM, Gulen MF, Reymond L, Gibelin A, Abrami L, Decout A, Heymann M,  
1248 van der Goot FG, Turcatti G, Behrendt R *et al*: **Targeting STING with covalent**  
1249 **small-molecule inhibitors**. *Nature* 2018, **559**(7713):269-273.
- 1250 41. Kim JH, Yoon YJ, Lee J, Choi EJ, Yi N, Park KS, Park J, Lotvall J, Kim YK, Gho  
1251 YS: **Outer membrane vesicles derived from Escherichia coli up-regulate**  
1252 **expression of endothelial cell adhesion molecules in vitro and in vivo**. *PloS one*  
1253 2013, **8**(3):e59276.
- 1254 42. Brown L, Wolf JM, Prados-Rosales R, Casadevall A: **Through the wall:**  
1255 **extracellular vesicles in Gram-positive bacteria, mycobacteria and fungi**. *Nat*  
1256 *Rev Microbiol* 2015, **13**(10):620-630.
- 1257 43. Short SA, White DC: **Metabolism of phosphatidylglycerol,**  
1258 **lysylphosphatidylglycerol, and cardiolipin of Staphylococcus aureus**. *J*  
1259 *Bacteriol* 1971, **108**(1):219-226.
- 1260 44. Coll RC, Robertson AA, Chae JJ, Higgins SC, Munoz-Planillo R, Insera MC,  
1261 Vetter I, Dungan LS, Monks BG, Stutz A *et al*: **A small-molecule inhibitor of the**  
1262 **NLRP3 inflammasome for the treatment of inflammatory diseases**. *Nature*  
1263 *medicine* 2015, **21**(3):248-255.
- 1264 45. Zevini A, Olganier D, Hiscott J: **Crosstalk between Cytoplasmic RIG-I and**  
1265 **STING Sensing Pathways**. *Trends in immunology* 2017, **38**(3):194-205.
- 1266 46. Ma Z, Damania B: **The cGAS-STING Defense Pathway and Its Counteraction**  
1267 **by Viruses**. *Cell host & microbe* 2016, **19**(2):150-158.
- 1268 47. Abdelnour A, Arvidson S, Bremell T, Ryden C, Tarkowski A: **The accessory gene**  
1269 **regulator (agr) controls Staphylococcus aureus virulence in a murine arthritis**  
1270 **model**. *Infect Immun* 1993, **61**(9):3879-3885.
- 1271 48. Tsatsaronis JA, Franch-Arroyo S, Resch U, Charpentier E: **Extracellular Vesicle**  
1272 **RNA: A Universal Mediator of Microbial Communication?** *Trends Microbiol*  
1273 2018, **26**(5):401-410.
- 1274 49. Resch U, Tsatsaronis JA, Le Rhun A, Stubiger G, Rohde M, Kasvandik S,  
1275 Holzmeister S, Tinnefeld P, Wai SN, Charpentier E: **A Two-Component**  
1276 **Regulatory System Impacts Extracellular Membrane-Derived Vesicle**  
1277 **Production in Group A Streptococcus**. *mBio* 2016, **7**(6).
- 1278 50. Sassi M, Augagneur Y, Mauro T, Ivain L, Chabelskaya S, Hallier M, Sallou O,  
1279 Felden B: **SRD: a Staphylococcus regulatory RNA database**. *RNA* 2015,  
1280 **21**(5):1005-1017.

- 1281 51. Pichon C, Felden B: **Small RNA genes expressed from Staphylococcus aureus**  
1282 **genomic and pathogenicity islands with specific expression among pathogenic**  
1283 **strains.** *Proc Natl Acad Sci U S A* 2005, **102**(40):14249-14254.
- 1284 52. Geissmann T, Chevalier C, Cros MJ, Boisset S, Fechter P, Noirot C, Schrenzel J,  
1285 Francois P, Vandenesch F, Gaspin C *et al*: **A search for small noncoding RNAs**  
1286 **in Staphylococcus aureus reveals a conserved sequence motif for regulation.**  
1287 *Nucleic Acids Res* 2009, **37**(21):7239-7257.
- 1288 53. Marchais A, Naville M, Bohn C, Bouloc P, Gautheret D: **Single-pass**  
1289 **classification of all noncoding sequences in a bacterial genome using**  
1290 **phylogenetic profiles.** *Genome Res* 2009, **19**(6):1084-1092.
- 1291 54. Bohn C, Rigoulay C, Chabelskaya S, Sharma CM, Marchais A, Skorski P,  
1292 Borezee-Durant E, Barbet R, Jacquet E, Jacq A *et al*: **Experimental discovery of**  
1293 **small RNAs in Staphylococcus aureus reveals a riboregulator of central**  
1294 **metabolism.** *Nucleic Acids Res* 2010, **38**(19):6620-6636.
- 1295 55. Nielsen JS, Christiansen MH, Bonde M, Gottschalk S, Frees D, Thomsen LE,  
1296 Kallipolitis BH: **Searching for small sigmaB-regulated genes in Staphylococcus**  
1297 **aureus.** *Arch Microbiol* 2011, **193**(1):23-34.
- 1298 56. Boisset S, Geissmann T, Huntzinger E, Fechter P, Bendridi N, Possedko M,  
1299 Chevalier C, Helfer AC, Benito Y, Jacquier A *et al*: **Staphylococcus aureus**  
1300 **RNAIII coordinately represses the synthesis of virulence factors and the**  
1301 **transcription regulator Rot by an antisense mechanism.** *Genes Dev* 2007,  
1302 **21**(11):1353-1366.
- 1303 57. Queck SY, Jameson-Lee M, Villaruz AE, Bach TH, Khan BA, Sturdevant DE,  
1304 Ricklefs SM, Li M, Otto M: **RNAIII-independent target gene control by the agr**  
1305 **quorum-sensing system: insight into the evolution of virulence regulation in**  
1306 **Staphylococcus aureus.** *Molecular cell* 2008, **32**(1):150-158.
- 1307 58. Novick RP, Ross HF, Projan SJ, Kornblum J, Kreiswirth B, Moghazeh S:  
1308 **Synthesis of staphylococcal virulence factors is controlled by a regulatory**  
1309 **RNA molecule.** *EMBO J* 1993, **12**(10):3967-3975.
- 1310 59. Benito Y, Kolb FA, Romby P, Lina G, Etienne J, Vandenesch F: **Probing the**  
1311 **structure of RNAIII, the Staphylococcus aureus agr regulatory RNA, and**  
1312 **identification of the RNA domain involved in repression of protein A**  
1313 **expression.** *RNA* 2000, **6**(5):668-679.
- 1314 60. Gruber AR, Lorenz R, Bernhart SH, Neubock R, Hofacker IL: **The Vienna RNA**  
1315 **websuite.** *Nucleic Acids Res* 2008, **36**(Web Server issue):W70-74.
- 1316 61. Wang C, Sinn M, Stifel J, Heiler AC, Sommershof A, Hartig JS: **Synthesis of All**  
1317 **Possible Canonical (3'-5'-Linked) Cyclic Dinucleotides and Evaluation of**  
1318 **Riboswitch Interactions and Immune-Stimulatory Effects.** *Journal of the*  
1319 *American Chemical Society* 2017, **139**(45):16154-16160.
- 1320 62. Paige JS, Nguyen-Duc T, Song W, Jaffrey SR: **Fluorescence imaging of cellular**  
1321 **metabolites with RNA.** *Science* 2012, **335**(6073):1194.

- 1322 63. Rosa-Fraile M, Rodriguez-Granger J, Haidour-Benamin A, Cuerva JM, Sampedro  
1323 A: **Granadaene: proposed structure of the group B Streptococcus polyenic**  
1324 **pigment**. *Applied and environmental microbiology* 2006, **72**(9):6367-6370.
- 1325 64. Whidbey C, Harrell MI, Burnside K, Ngo L, Becraft AK, Iyer LM, Aravind L, Hitti  
1326 J, Waldorf KM, Rajagopal L: **A hemolytic pigment of Group B Streptococcus**  
1327 **allows bacterial penetration of human placenta**. *The Journal of experimental*  
1328 *medicine* 2013, **210**(6):1265-1281.
- 1329 65. Lange BM, Rujan T, Martin W, Croteau R: **Isoprenoid biosynthesis: the**  
1330 **evolution of two ancient and distinct pathways across genomes**. *Proceedings of*  
1331 *the National Academy of Sciences of the United States of America* 2000,  
1332 **97**(24):13172-13177.
- 1333 66. Chen F, Di H, Wang Y, Cao Q, Xu B, Zhang X, Yang N, Liu G, Yang CG, Xu Y *et*  
1334 *al*: **Small-molecule targeting of a diapophytoene desaturase inhibits S. aureus**  
1335 **virulence**. *Nature chemical biology* 2016, **12**(3):174-179.
- 1336 67. Singer M, Deutschman CS, Seymour CW, Shankar-Hari M, Annane D, Bauer M,  
1337 Bellomo R, Bernard GR, Chiche JD, Coopersmith CM *et al*: **The Third**  
1338 **International Consensus Definitions for Sepsis and Septic Shock (Sepsis-3)**.  
1339 *Jama* 2016, **315**(8):801-810.
- 1340 68. Shankar-Hari M, Phillips GS, Levy ML, Seymour CW, Liu VX, Deutschman CS,  
1341 Angus DC, Rubenfeld GD, Singer M, Sepsis Definitions Task F: **Developing a**  
1342 **New Definition and Assessing New Clinical Criteria for Septic Shock: For the**  
1343 **Third International Consensus Definitions for Sepsis and Septic Shock**  
1344 **(Sepsis-3)**. *Jama* 2016, **315**(8):775-787.
- 1345 69. Kolter J, Henneke P: **Codevelopment of Microbiota and Innate Immunity and**  
1346 **the Risk for Group B Streptococcal Disease**. *Frontiers in immunology* 2017,  
1347 **8**:1497.
- 1348 70. Costa Franco MM, Marim F, Guimaraes ES, Assis NRG, Cerqueira DM, Alves-  
1349 Silva J, Harms J, Splitter G, Smith J, Kanneganti TD *et al*: **Brucella abortus**  
1350 **Triggers a cGAS-Independent STING Pathway To Induce Host Protection**  
1351 **That Involves Guanylate-Binding Proteins and Inflammasome Activation**. *J*  
1352 *Immunol* 2018, **200**(2):607-622.
- 1353 71. Gros Lambert M, Py BF: **Spotlight on the NLRP3 inflammasome pathway**. *J*  
1354 *Inflamm Res* 2018, **11**:359-374.
- 1355 72. Prados-Rosales R, Baena A, Martinez LR, Luque-Garcia J, Kalscheuer R,  
1356 Veeraraghavan U, Camara C, Nosanchuk JD, Besra GS, Chen B *et al*:  
1357 **Mycobacteria release active membrane vesicles that modulate immune**  
1358 **responses in a TLR2-dependent manner in mice**. *J Clin Invest* 2011,  
1359 **121**(4):1471-1483.
- 1360 73. Castiglia V, Piersigilli A, Ebner F, Janos M, Goldmann O, Dambock U, Kroger A,  
1361 Weiss S, Knapp S, Jamieson AM *et al*: **Type I Interferon Signaling Prevents IL-**  
1362 **1beta-Driven Lethal Systemic Hyperinflammation during Invasive Bacterial**  
1363 **Infection of Soft Tissue**. *Cell Host Microbe* 2016, **19**(3):375-387.

- 1364 74. Barbet G, Sander LE, Geswell M, Leonardi I, Cerutti A, Iliev I, Blander JM:  
1365 **Sensing Microbial Viability through Bacterial RNA Augments T Follicular**  
1366 **Helper Cell and Antibody Responses.** *Immunity* 2018, **48**(3):584-598 e585.
- 1367 75. Chutkan H, Macdonald I, Manning A, Kuehn MJ: **Quantitative and qualitative**  
1368 **preparations of bacterial outer membrane vesicles.** *Methods in molecular*  
1369 *biology* 2013, **966**:259-272.
- 1370 76. Lee EY, Choi DY, Kim DK, Kim JW, Park JO, Kim S, Kim SH, Desiderio DM,  
1371 Kim YK, Kim KP *et al*: **Gram-positive bacteria produce membrane vesicles:**  
1372 **Proteomics-based characterization of Staphylococcus aureus-derived**  
1373 **membrane vesicles.** *Proteomics* 2009, **9**(24):5425-5436.
- 1374 77. Sponholz C, Kramer M, Schoneweck F, Menzel U, Inanloo Rahatloo K,  
1375 Giamarellos-Bourboulis EJ, Papavassileiou V, Lymberopoulou K, Pavlaki M,  
1376 Koutelidakis I *et al*: **Polymorphisms of cystathionine beta-synthase gene are**  
1377 **associated with susceptibility to sepsis.** *European journal of human genetics* :  
1378 *EJHG* 2016, **24**(7):1041-1048.
- 1379 78. Tolstik T, Marquardt C, Beleites C, Matthaus C, Bielecki C, Burger M, Krafft C,  
1380 Dirsch O, Settmacher U, Popp J *et al*: **Classification and prediction of HCC**  
1381 **tissues by Raman imaging with identification of fatty acids as potential lipid**  
1382 **biomarkers.** *J Cancer Res Clin* 2015, **141**(3):407-418.
- 1383 79. Ramoji A, Neugebauer U, Bocklitz T, Foerster M, Kiehntopf M, Bauer M, Popp J:  
1384 **Toward a Spectroscopic Hemogram: Raman Spectroscopic Differentiation of**  
1385 **the Two Most Abundant Leukocytes from Peripheral Blood.** *Anal Chem* 2012,  
1386 **84**(12):5335-5342.
- 1387 80. Jehlicka J, Edwards HGM, Osterrothova K, Novotna J, Nedbalova L, Kopecky J,  
1388 Nemec I, Oren A: **Potential and limits of Raman spectroscopy for carotenoid**  
1389 **detection in microorganisms: implications for astrobiology.** *Philos T R Soc A*  
1390 2014, **372**(2030).
- 1391 81. Wu HW, Volponi JV, Oliver AE, Parikh AN, Simmons BA, Singh S: **In vivo**  
1392 **lipidomics using single-cell Raman spectroscopy.** *Proceedings of the National*  
1393 *Academy of Sciences of the United States of America* 2011, **108**(9):3809-3814.
- 1394 82. Czamara K, Majzner K, Pacia MZ, Kochan K, Kaczor A, Baranska M: **Raman**  
1395 **spectroscopy of lipids: a review.** *J Raman Spectrosc* 2015, **46**(1):4-20.
- 1396 83. Jentzsch PV, Ciobota V: **Raman spectroscopy as an analytical tool for analysis**  
1397 **of vegetable and essential oils.** *Flavour Frag J* 2014, **29**(5):287-295.
- 1398 84. Koeppen K, Hampton TH, Jarek M, Scharfe M, Gerber SA, Mielcarz DW, Demers  
1399 EG, Dolben EL, Hammond JH, Hogan DA *et al*: **A Novel Mechanism of Host-**  
1400 **Pathogen Interaction through sRNA in Bacterial Outer Membrane Vesicles.**  
1401 *PLoS pathogens* 2016, **12**(6):e1005672.
- 1402 85. Kusic D, Kampe B, Ramoji A, Neugebauer U, Rosch P, Popp J: **Raman**  
1403 **spectroscopic differentiation of planktonic bacteria and biofilms.** *Anal Bioanal*  
1404 *Chem* 2015, **407**(22):6803-6813.

- 1405 86. Verma SP, Wallach DFH: **Raman-Spectra of Some Saturated, Unsaturated and**  
1406 **Deuterated C18 Fatty-Acids in Hch-Deformation and Ch-Stretching Regions.**  
1407 *Biochim Biophys Acta* 1977, **486**(2):217-227.
- 1408 87. Wang W, Hu D, Wu C, Feng Y, Li A, Liu W, Wang Y, Chen K, Tian M, Xiao F *et*  
1409 *al*: **STING promotes NLRP3 localization in ER and facilitates NLRP3**  
1410 **deubiquitination to activate the inflammasome upon HSV-1 infection.** *PLoS*  
1411 *Pathog* 2020, **16**(3):e1008335.
- 1412 88. Wang X, Eagen WJ, Lee JC: **Orchestration of human macrophage NLRP3**  
1413 **inflammasome activation by Staphylococcus aureus extracellular vesicles.**  
1414 *Proc Natl Acad Sci U S A* 2020, **117**(6):3174-3184
- 1415  
1416

1417 **FIGURE LEGENDS**

1418 **Figure. 1 Gram-positive bacteria and bacterial RNA induce the canonical**  
1419 **inflammasome pathway via STING**

1420 **(A-D)** THP1 (black), *CASP1*<sup>-/-</sup> (blue), *ASC*<sup>-/-</sup> (grey), *CASP4*<sup>-/-</sup> (green), *cGAS*<sup>-/-</sup> (white) and  
1421 *STING*<sup>-/-</sup> (pattern), MΦs were infected with SA (MOI 10) and GBS (MOI 20), IL-1β  
1422 production was measured in cell supernatant.

1423 **(E)** THP1, *STING*<sup>-/-</sup>, and *cGAS*<sup>-/-</sup> MΦs were infected with SA (MOI 10) and GBS (MOI 20),  
1424 cleaved IL-1β (P17) and caspase-1 (P20) were detected in cell supernatants (Sup) and pro-IL-  
1425 1β, pro-caspase-1 and GAPDH in cell lysate by immunoblotting.

1426 **(F)** *STING*<sup>-/-</sup> (pattern), *STING*<sup>-/-</sup> expressing *STING*<sup>R232</sup> (Black) MΦs were infected with SA  
1427 (MOI 10) and GBS (MOI 20), IL-1β production was measured in cell supernatant.

1428 **(G,H)** Human blood derived MΦs were pre-treated with increasing concentrations of STING  
1429 inhibitor (H-151) (100 μM, 50 μM, 10 μM) for 1 h and then infected with SA (MOI 10) and  
1430 GBS (MOI 20) respectively. IL-1β production was measured in cell supernatant.

1431 **(I)** IL-1β production in wild type THP1 MΦs following transfection with increasing  
1432 concentrations of SA RNA (RNA+LF) (5 μg/ml, 2.5 μg/ml, 0.1 μg/ml).

1433 **(J,K,L)** THP1 MΦs were pre-treated with increasing concentrations of cytosolic RNase A  
1434 (RNase A+LF) (100 ng/ml, 50ng/ml, 10 ng/ml) followed by infection with SA. IL-1β  
1435 production was measured in cell supernatant.

1436 Heat inactivated RNase A (100 ng/ml, 50ng/ml, 10 ng/ml) **(K)** and DNase I (100 ng/ml,  
1437 50ng/ml, 10 ng/ml) **(L)** were used as a control in similar experimental setup.

1438 Data shown are mean ±SD (n=3), representative of at least three independent experiments.  
1439 Asterisks indicate statistically significant differences (\*p < 0.05, \*\*p < 0.01 and \*\*\*p <  
1440 0.001).

1441 **Figure. 2 *S. aureus* and GBS secrete multi-lamellar lipid bodies (MLBs) that contain**  
1442 **staphyloxanthin type of lipids and RNA**

1443 **(A,B)** Scanning electron microscopic (SEM) images of *S. aureus* **(A)** and GBS **(B)**. The  
1444 arrowhead indicates the multi-lobular secretion from the membrane.

1445 **(C)** Magnified SEM image of GBS showing large aggregated assemblies of MLBs.

1446 **(D)** Freeze fracture TEM image of *S. aureus*. The arrowhead indicates cytoplasmic  
1447 accumulation and secretion of lipid bodies.

1448 **(E)** Freeze fracture TEM image of GBS; the arrowhead indicates bacterial membrane  
1449 imbibing the cytoplasmic accumulated lipid bodies.

1450 **(F)** Negative staining TEM images of purified membrane vesicles (MVs) from GBS. The  
1451 inset image shows a magnified ultrastructure of MVs.

1452 **(G,H)** Negative staining TEM images of purified Multi lamellar lipid bodies (MLBs) from  
1453 GBS **(G)** and *S. aureus* **(H)**. The inset image shows a magnified ultrastructure of MLBs.

1454 **(I)** Freeze fracture TEM image of GBS culture supernatant purified MLBs. The arrowhead  
1455 indicates multi lamellar lipid bodies (MLBs).

1456 Scale bar in image (a, b c =200 nm, d, e, f, g, h, i and inset = 100 nm).

1457 **(J)** Size distribution of vesicles isolated from *S. aureus* (MLBs+MVs) by dynamic light  
1458 scattering. The x-axis is set to logarithmic scale.

1459 **(K,L)** DLS analysis representing size of MVs **(K)** and MLBs **(L)** isolated from *S. aureus*. The  
1460 x-axis is set to logarithmic scale.

1461 **(M)** IL-1 $\beta$  production was measured in wild type THP1 M $\Phi$ s following stimulation with  
1462 MLBs (10  $\mu$ g/ml, 5  $\mu$ g/ml) and MVs (10  $\mu$ g/ml, 5  $\mu$ g/ml) isolated from SA.

1463 Data shown are mean  $\pm$ SD (n=3), representative of at least three independent experiments.  
1464 Asterisks indicate statistically significant differences (\*\*p < 0.01).

1465 **(N)** Raman spectra of *S. aureus*. The prominent Raman peaks at 1009, 1163 and 1528 cm<sup>-1</sup>  
1466 corresponds to staphyloxanthin type of lipids are marked with dotted lines.

1467 **(O,P)** Raman spectra of MLBs isolated from *S. aureus*. The prominent Raman peaks  
1468 corresponding to staphyloxanthin type of lipids are marked with star. For positive control  
1469 refer (Figure 6 A,B) Raman spectra of HPLC purified staphyloxanthin type of lipids.

1470 **Figure. 3 MLBs from Gram-positive bacteria activate the STING dependent NLRP3**  
1471 **canonical inflammasome pathway**

1472 **(A,B)** Cell death and IL-1 $\beta$  production measured in human blood-derived M $\Phi$ s following  
1473 stimulation with GBS and *S. aureus* MLBs (10  $\mu$ g/ml) respectively.

1474 **(C,D)** THP1 (black), *ASC*<sup>-/-</sup> (grey), *CASP1*<sup>-/-</sup> (blue), *CASP4*<sup>-/-</sup> (green) M $\Phi$ s show IL-1 $\beta$   
1475 production following stimulations with *S. aureus* and GBS MLBs (10  $\mu$ g/ml) respectively.

1476 (E,F) THP1 (black), *STING*<sup>-/-</sup> (pattern) *cGAS*<sup>-/-</sup> (white) MΦs show IL-1β production when  
1477 stimulated with *S. aureus* and GBS MLBs (10 μg/ml) respectively.

1478 (G) Wild type THP1 MΦs (black) were pre-treated with and without MCC950 inhibitor (red)  
1479 (5 μM) for 1 h and stimulated with SA MLBs; IL-1β was measured in the supernatant.

1480 (H) Wild type THP1 MΦs (black) were pre-treated with increasing concentrations of KCl (60  
1481 mM, 45 mM, 75 mM) and stimulated with GBS MLBs (10 μg/ml). IL-1β production was  
1482 measured in cell supernatant.

1483 (I) Wild type THP1 MΦs were pre-treated with increasing concentrations of Dynasore  
1484 inhibitor for 1 h and stimulated with GBS MLBs. IL-1β production was measured in cell  
1485 supernatant.

1486 Data shown are mean ±SD (n=3), representative of at least three independent experiments.  
1487 Asterisks indicate statistically significant differences (\*p < 0.05, \*\*p < 0.01 and \*\*\*p <  
1488 0.001).

1489 **Figure. 4 RNA aptamers present in bacterial small non-coding RNA activates STING**  
1490 **for IL-1β response**

1491 (A,B) THP1 (black), *CASP1*<sup>-/-</sup> (blue), *CASP4*<sup>-/-</sup> (green) MΦs were stimulated with MLB RNA,  
1492 cytosolic MLB RNA (RNA+LF) (5 μg/ml). IL-1β and cell death were measured in  
1493 supernatant.

1494 (C) THP1 (black) MΦs were pre-treated with increasing concentrations of MCC950 inhibitor  
1495 (red) (5 μM, 10 μM) and stimulated with *S. aureus* RNA, lipofectamine, nigericin (6.7 μM),  
1496 cytoplasmic RNA (RNA+LF) (5 μg/ml, 2.5 μg/ml), IL-1β was determined in cell supernatant.

1497 (D,E,F) THP1 MΦs were pre-treated with increasing concentrations of cytosolic RNase A  
1498 (RNase A+LF) (100 ng/ml, 50ng/ml, 10 ng/ml) followed by stimulation with SA MLBs, IL-  
1499 1β was determined.

1500 Heat inactivated RNase A (100 ng/ml, 50ng/ml, 10 ng/ml) (E) and DNase I (100 ng/ml,  
1501 50ng/ml, 10 ng/ml) (F) were used as a control in similar experimental setup.

1502 (G) RNA capillary gel electrophoresis of two types of purified GBS RNA (Big-BRNA (>200  
1503 nucleotides), micro-μRNA (<200 nucleotides)) (1 μg) run on QIAxcel advanced system.  
1504 Please note lower most band in B RNA sample is a capillary electrophoresis marker.



1505 **(H)** Optical density at 450 nm measured in binding assay of GBS  $\mu$ RNA, B RNA (B RNA) (4  
1506  $\mu$ g, 2  $\mu$ g, 1  $\mu$ g) with HRP-labelled CDN (c-di-AMP) (16  $\mu$ M). Non-labelled CDN (NL c-di-  
1507 AMP) was used as a control.

1508 **(I,J)** THP1 (black), *STING*<sup>-/-</sup> (pattern) and *cGAS*<sup>-/-</sup> (white) M $\Phi$ s were stimulated with GBS **(I)**  
1509 and SA **(J)**  $\mu$ RNA ( $\mu$ RNA), cytosolic  $\mu$ RNA ( $\mu$ RNA+LF) (5  $\mu$ g/ml) and IL-1 $\beta$  production  
1510 measured.

1511 **(K)** IL-1 $\beta$  production was measured in THP1 M $\Phi$ s upon infection with *S. aureus* (MOI 10)  
1512 and  $\Delta$ *agr* mutant (MOI 10) bacteria.

1513 **(L)** IL-1 $\beta$  production measured in human blood-derived M $\Phi$ s when infected with *S. aureus*  
1514 (MOI 10) and  $\Delta$ *agr* mutant (MOI 10) bacteria.

1515 **(M)** RNA capillary electrophoresis gel of  $\mu$ RNA (1  $\mu$ g) from *S. aureus* and  $\Delta$ *agr* mutant  
1516 bacteria run on QIAxcel advanced system.

1517 **(N)** TNF- $\alpha$  production measured in THP1 M $\Phi$ s when stimulated with increasing  
1518 concentration of *S. aureus* and  $\Delta$ *agr* mutant  $\mu$ RNA (5  $\mu$ g/ml, 2.5  $\mu$ g/ml).

1519 **(O)** IL-1 $\beta$  production measured in THP1 (black) M $\Phi$ s when stimulated with  $\mu$ RNA (5  $\mu$ g/ml,  
1520 2.5  $\mu$ g/ml) from *S. aureus* and  $\Delta$ *agr* mutant on the surface (SA and  $\Delta$ *agr*) and into the cytosol  
1521 (SA+LF,  $\Delta$ *agr*+LF) and only LF.

1522 **(P)** Optical density at 450 nm measured in binding assay of bacterial  $\mu$ RNA (4  $\mu$ g, 2  $\mu$ g, 1  $\mu$ g)  
1523 from *S. aureus* and  $\Delta$ *agr* mutant with HRP labelled CDN (c-di-AMP) (16  $\mu$ M). Non-labelled  
1524 CDN (NL c-di-AMP) was used as a control.

1525 Data shown are mean  $\pm$ SD (n=3), representative of at least three independent experiments.  
1526 Asterisks indicate statistically significant differences (\*p < 0.05, \*\*p < 0.01 and \*\*\*p <  
1527 0.001).

1528 **Fig. 5 Differentially abundant  $\mu$ RNA species are present in *S. aureus* MLBs and analysis**  
1529 **of RNAIII with A,7,8,9,A stem loop domain present in MLBs for the inflammasome**  
1530 **activation**

1531 **(A)** Heat map of differentially abundant  $\mu$ RNA sequence reads obtained through deep  
1532 sequencing in SA, SA-MLB and SA- $\Delta$ *agr*. The reads were mapped on *S. aureus* subsp.  
1533 *aureus* N315 (accession number: NC\_002745.2) corresponding to 186 differentially abundant  
1534 genomic regions.

1535 (B) IL-1 $\beta$  production measured in THP1 (black) M $\Phi$  following stimulations with *in-vitro*-  
1536 transcribed cytosolic RNAIII (RNAIII+LF) (5  $\mu$ g/ml, 2.5  $\mu$ g/ml), surface RNAIII and LF.

1537 (C) Optical density at 450 nm measured in binding assay of *in-vitro*-transcribed RNAIII (4  
1538  $\mu$ g, 2  $\mu$ g, 1  $\mu$ g) with cyclic-di-AMP (16  $\mu$ M).

1539 (D) Semi quantitative PCR analysis of RNAIII central domain A,7,8,9,A (202-317 nt) in SA,  
1540 SA- $\Delta$ agr and SA-MLB. HP RNA was used as a control.

1541 (E) IL-1 $\beta$  production measured in THP1 (black) M $\Phi$  following stimulations with *in-vitro*-  
1542 transcribed RNAIII central domain A,7,8,9,A (202-317 nt) (5  $\mu$ g/ml, 2.5  $\mu$ g/ml) on surface  
1543 and into the cytosol (202-317+LF), HP RNA (HP+LF) and LF.

1544 (F) THP1 (black), *STING*<sup>-/-</sup>(pattern) and *cGAS*<sup>-/-</sup>(white) M $\Phi$  were stimulated with *in-vitro*-  
1545 transcribed RNAIII central domain A,7,8,9,A (202-317 nt) (5  $\mu$ g/ml, 2.5  $\mu$ g/ml) on surface  
1546 and into the cytosol (202-317+LF), and IL-1 $\beta$  production measured.

1547 (G) Analysis of *in vitro*-transcribed RNAIII central domain A,7,8,9,A (202-317 nt) spinach  
1548 binding to cyclic-di-AMP at 37°C in presence of DFHBI (10  $\mu$ M) and different  
1549 concentrations of cyclic-di-AMP (0.1 pM-10 nM). Data from replicates (black) and mean  
1550 (blue) are shown. Background fluorescence was subtracted from all data points.

1551 Data shown are mean  $\pm$ SD (n=3), representative of at least three independent experiments.  
1552 Asterisks indicate statistically significant differences (\*p < 0.05, \*\*p < 0.01 and \*\*\*p <  
1553 0.001).

1554 **Fig. 6 Staphyloxanthin type of lipids in MLBs can target RNA PAMPs to the cytoplasm**  
1555 **to activate the inflammasome**

1556 (A,B) 4,4'-diaponeurosporenoic acid and staphyloxanthin were HPLC purified from SA  
1557 followed by fingerprint LC-MS spectral analysis and confirmed by Raman spectra analysis.  
1558 The prominent Raman peaks are marked with dotted lines.

1559 (C) Cryo TEM image of HPLC purified 4,4'-diaponeurosporenoic acid; the arrowhead  
1560 indicates multi-lamellar lipid structures; the bar represents 100 nm.

1561 (D) IL-1 $\beta$  production in THP1 M $\Phi$ s following stimulations with increasing concentrations of  
1562 SA RNA, HPLC purified 4,4'-diaponeurosporenoic acid (St1), staphyloxanthin (St2) (0.125  
1563  $\mu$ M), and 4,4'-diaponeurosporenoic acid (St1) (0.125  $\mu$ M), staphyloxanthin (St2) micelles  
1564 with RNA (St1+RNA, St2+RNA) (5  $\mu$ g/ml, 2.5  $\mu$ g/ml).

1565 (E) IL-1 $\beta$  production in human blood-derived M $\Phi$ s when stimulated with 4,4'-  
1566 diaponeurosporenoic acid (St1) (0.125  $\mu$ M), staphyloxanthin (St2) (0.125  $\mu$ M) and 4,4'-  
1567 diaponeurosporenoic acid (St1+RNA) staphyloxanthin (St2+RNA) micelles with increasing  
1568 concentrations of SA RNA (5  $\mu$ g/ml, 2.5  $\mu$ g/ml).

1569 (F) Inhibition of the staphyloxanthin biosynthetic pathway using the small molecular drug  
1570 naftifine, I. Paper disc (white) with PBS as control showing no inhibition of biosynthetic  
1571 pathway leading to golden yellow pigmentation over bacterial lawn (II,III,IV). Increasing  
1572 concentrations of naftifine (200 ng/ml, 100 ng/ml, 10 ng/ml) applied on paper disc (white)  
1573 inhibiting the biosynthetic pathway leading to a zone of decolourization and opaque growth of  
1574 GBS.

1575 (G,H) Raman spectra of (G) SA and SA treated with naftifine (SA+Naftifine) and (H) GBS  
1576 and GBS treated naftifine (50 ng/ml). The fingerprint Raman peaks are marked by dotted  
1577 lines.

1578 (I,J) Human blood-derived M $\Phi$ s were infected (I) SA (MOI 10) and SA treated with naftifine  
1579 (SA+Naftifine) and (J) GBS (MOI 20) and GBS treated with naftifine (GBS+Naftifine) (50  
1580 ng/ml). IL-1 $\beta$  was measured in supernatant.

1581 (K,L) Human blood-derived M $\Phi$ s showing TNF- $\alpha$  production when infected with (K) GBS  
1582 (MOI 10) and GBS treated with naftifine (GBS+Naftifine) and (L) SA (MOI 20) and SA  
1583 treated with naftifine (SA+Naftifine).

1584 (M,N) Wild type THP1 M $\Phi$ s (black) were stimulated on surface and into cytosol with  
1585 naftifine treated SA and GBS  $\mu$ RNA (5 mg/ml) (SA (Naftifine)+LF) (GBS (Naftifine)+LF)  
1586 respectively. IL-1 $\beta$  production was measured.

1587 Data shown are mean  $\pm$ SD (n=3), representative of at least three independent experiments.  
1588 Asterisks indicate statistically significant differences (\*p < 0.05, \*\*p < 0.01 and \*\*\*p <  
1589 0.001).

1590 **Fig. 7 Gram-positive sepsis patients shows hallmarks of MLB-mediated inflammasome**  
1591 **activation**

1592 (A) Diagrammatic representation of characteristics of *S. aureus* patient isolates (n=50)  
1593 showing the presence of RNAIII (beige), absence of RNAIII (grey) and origin of bacteria. Pie  
1594 diagram shows the infection focus of the patients.

1595 **(B)** THP1 MΦs (black) were stimulated with bacterial μRNA (5 μg/ml, 2.5 μg/ml) of patient  
1596 isolates P5, P11, P27, P14, P15, P36 on the surface and cytosolically (P5+LF, P11+LF,  
1597 P27+LF, P14+LF, P15+LF, P36+LF). IL-1β production was measured.

1598 **(C)** Immunoblots showing active GSDMD (22 kDa) in plasma of *S. aureus* sepsis patients (1-  
1599 4), ICU patients T1 (1-3), T6 (1-3).

1600 **(D)** THP1 MΦs were stimulated on the surface and cytosolically with μRNA (2.5 μg/ml)  
1601 isolated from plasma of *S. aureus* sepsis patients (n=4) and ICU controls pre operation and  
1602 post operation (n=3). IL-1β production was measured. Asterisks indicate statistically sign

**Figure 1**

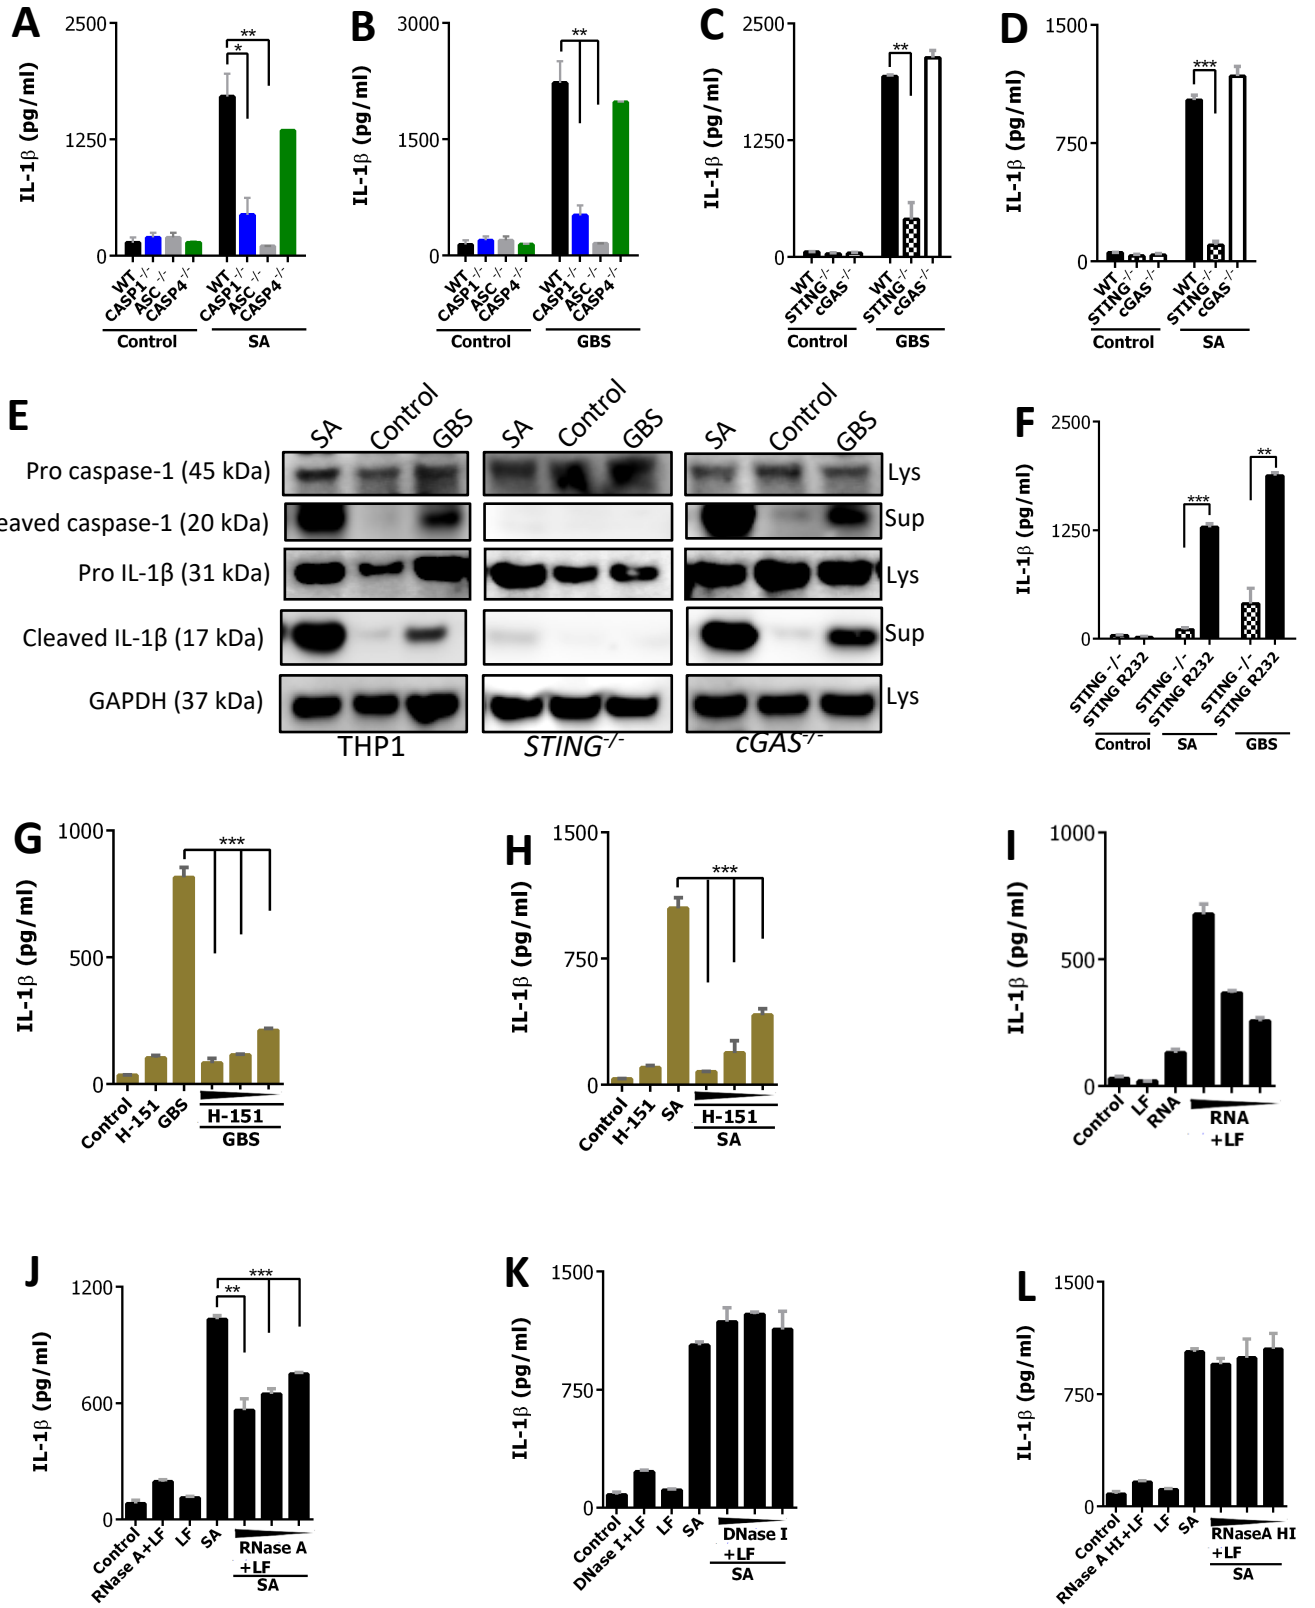

**Figure 2**

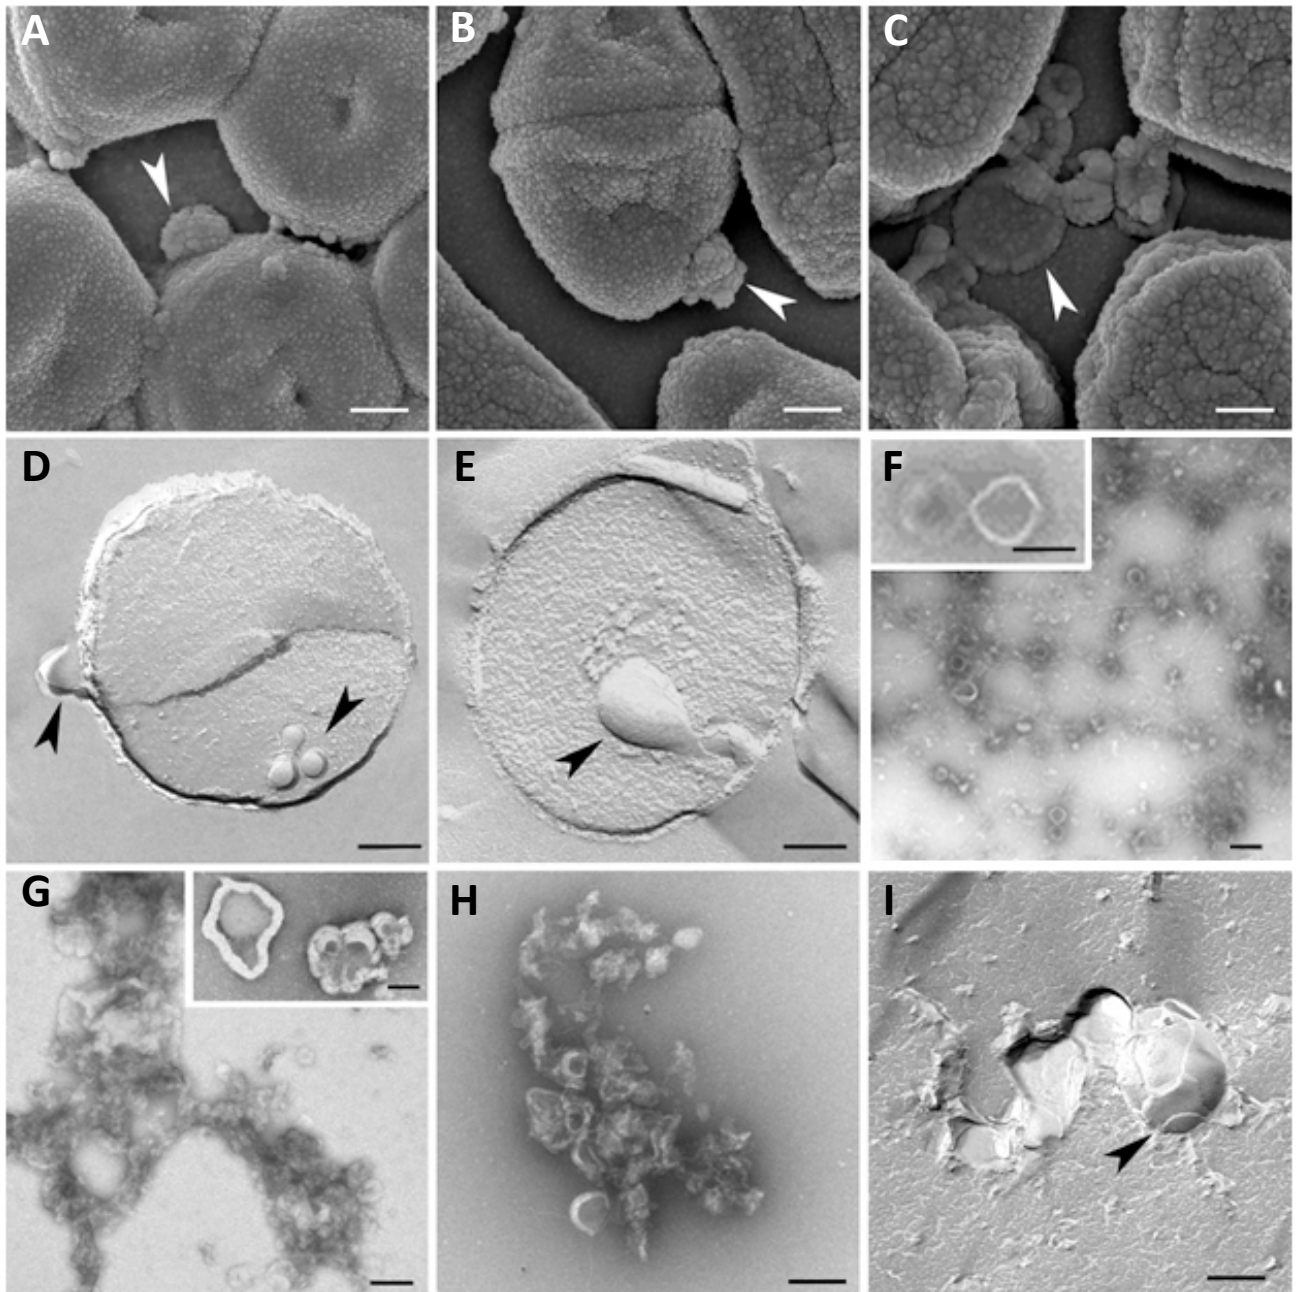

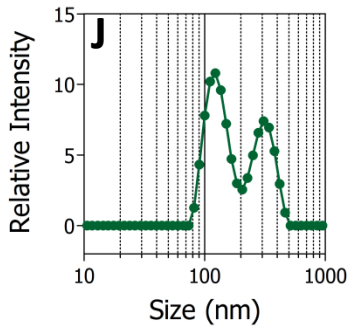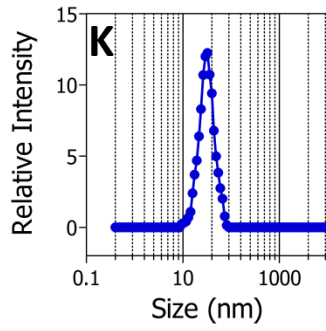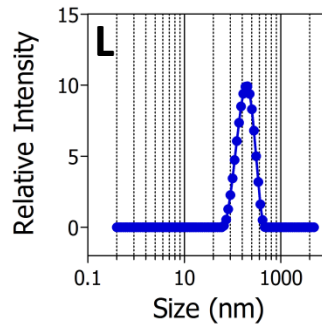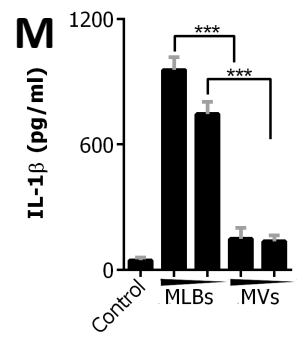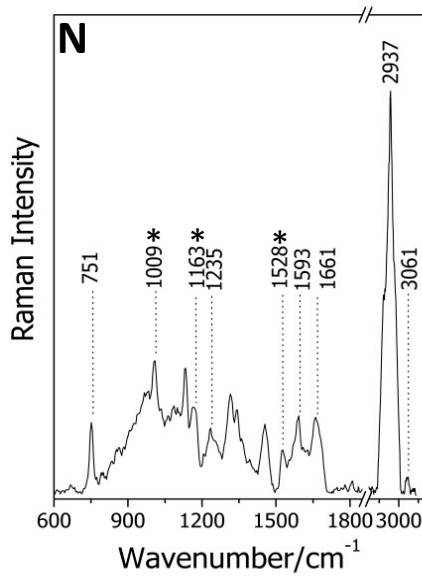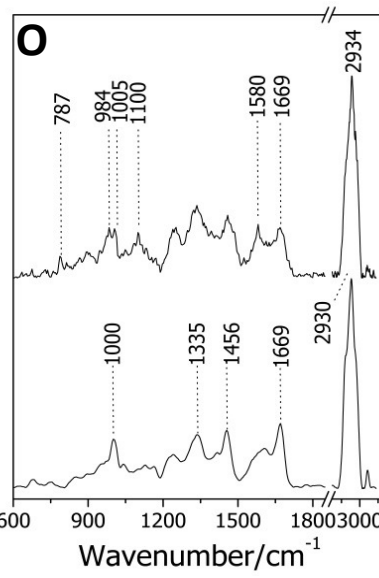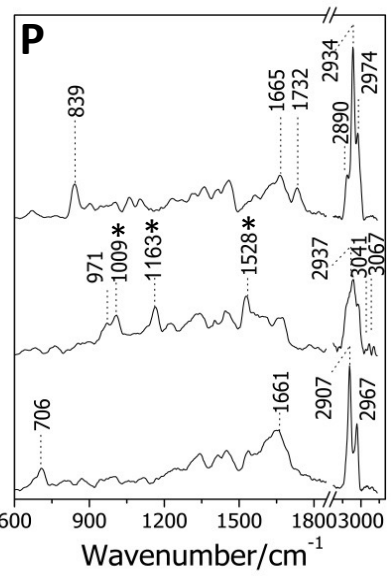

**Figure 3**

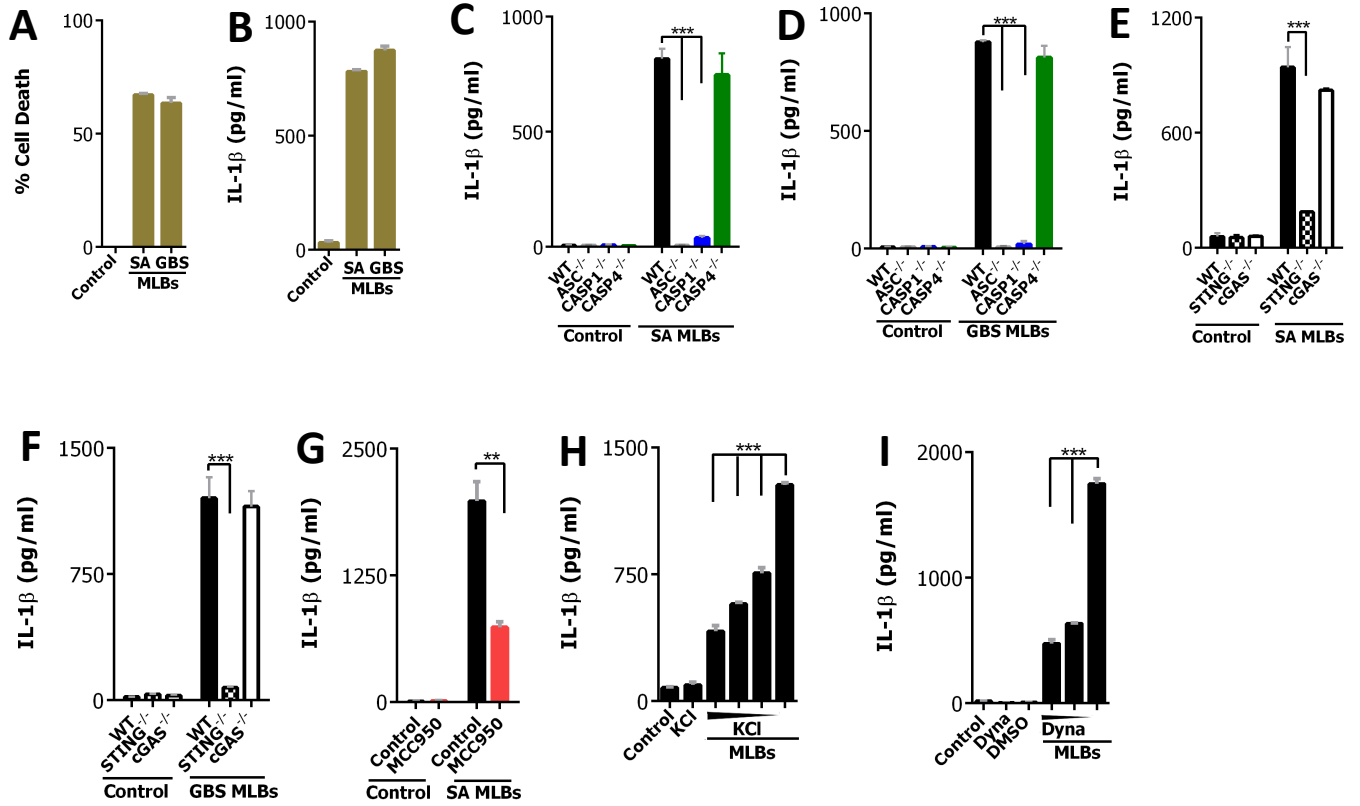



**Figure 4**

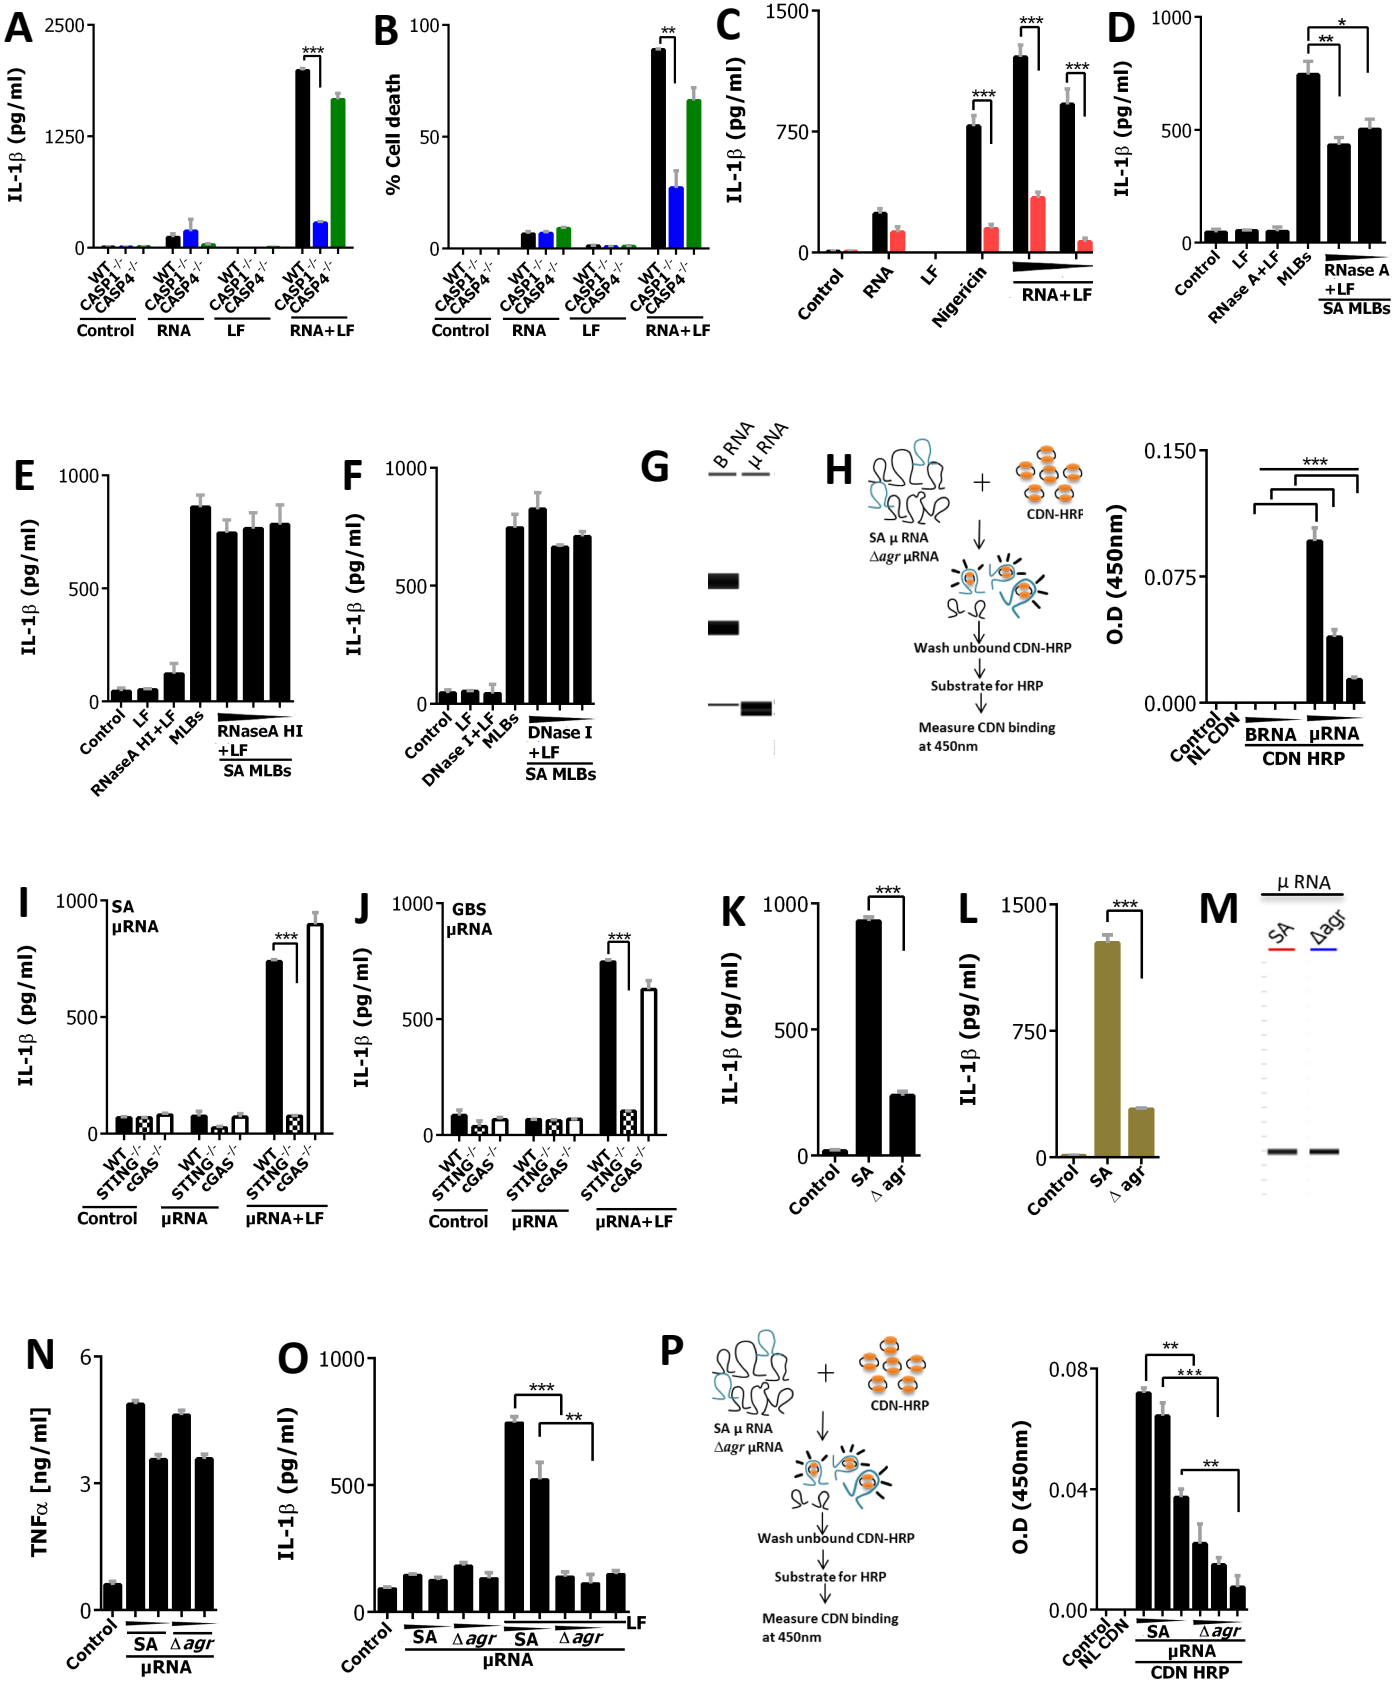

**Figure 5**

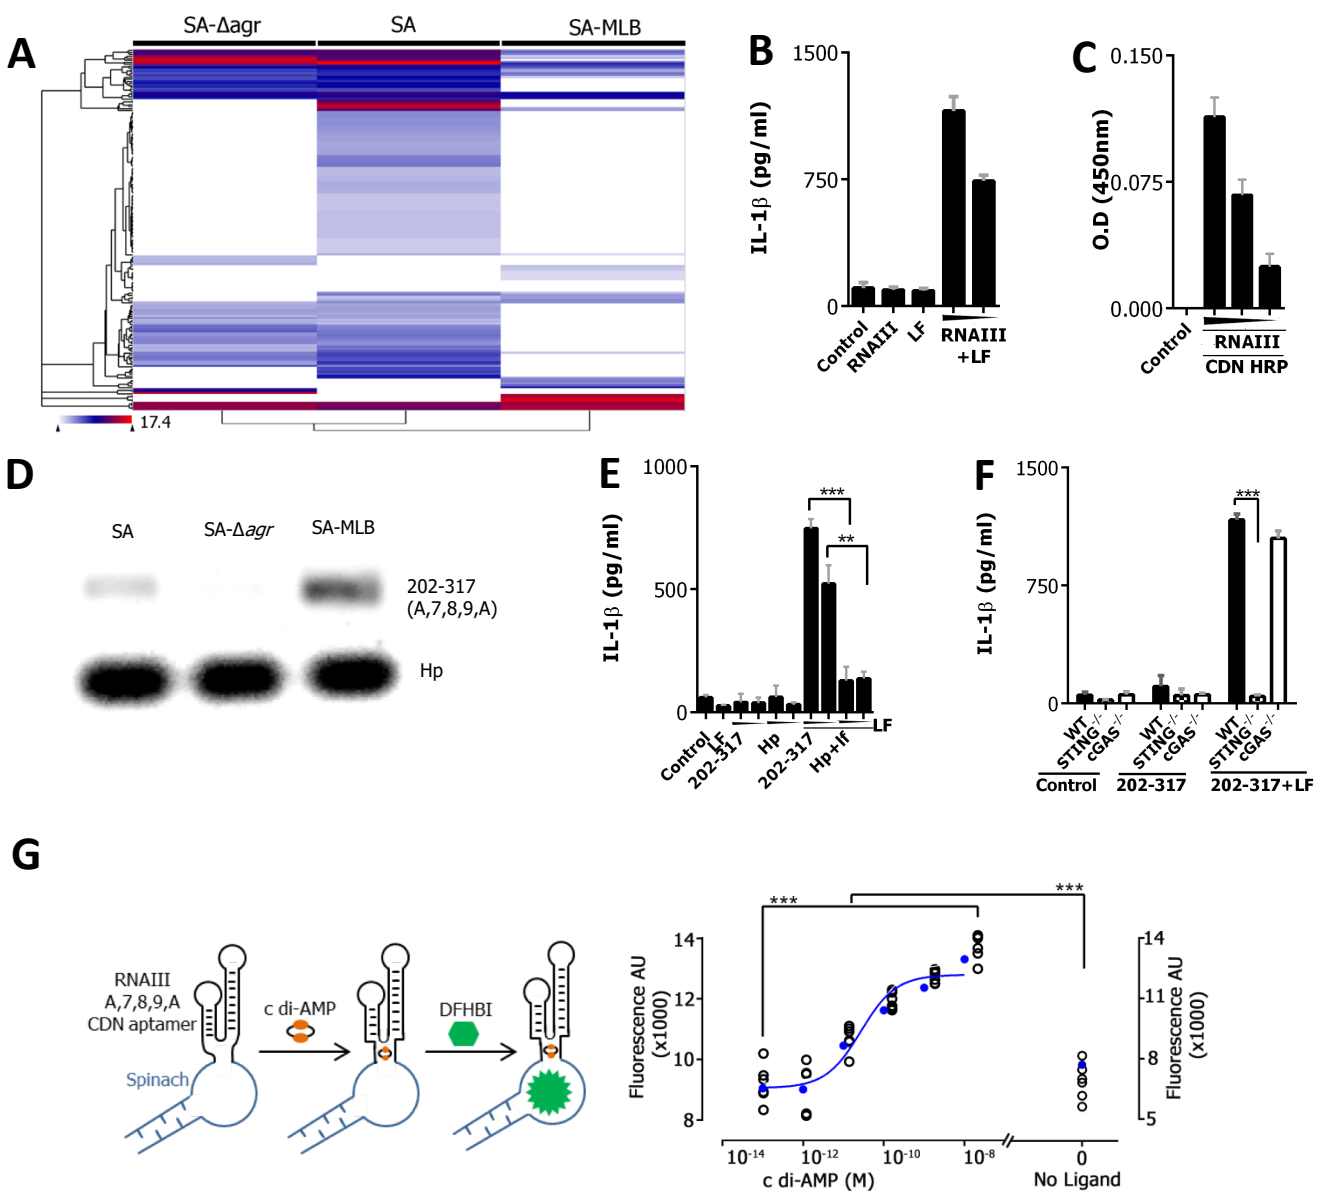

**Figure 6**

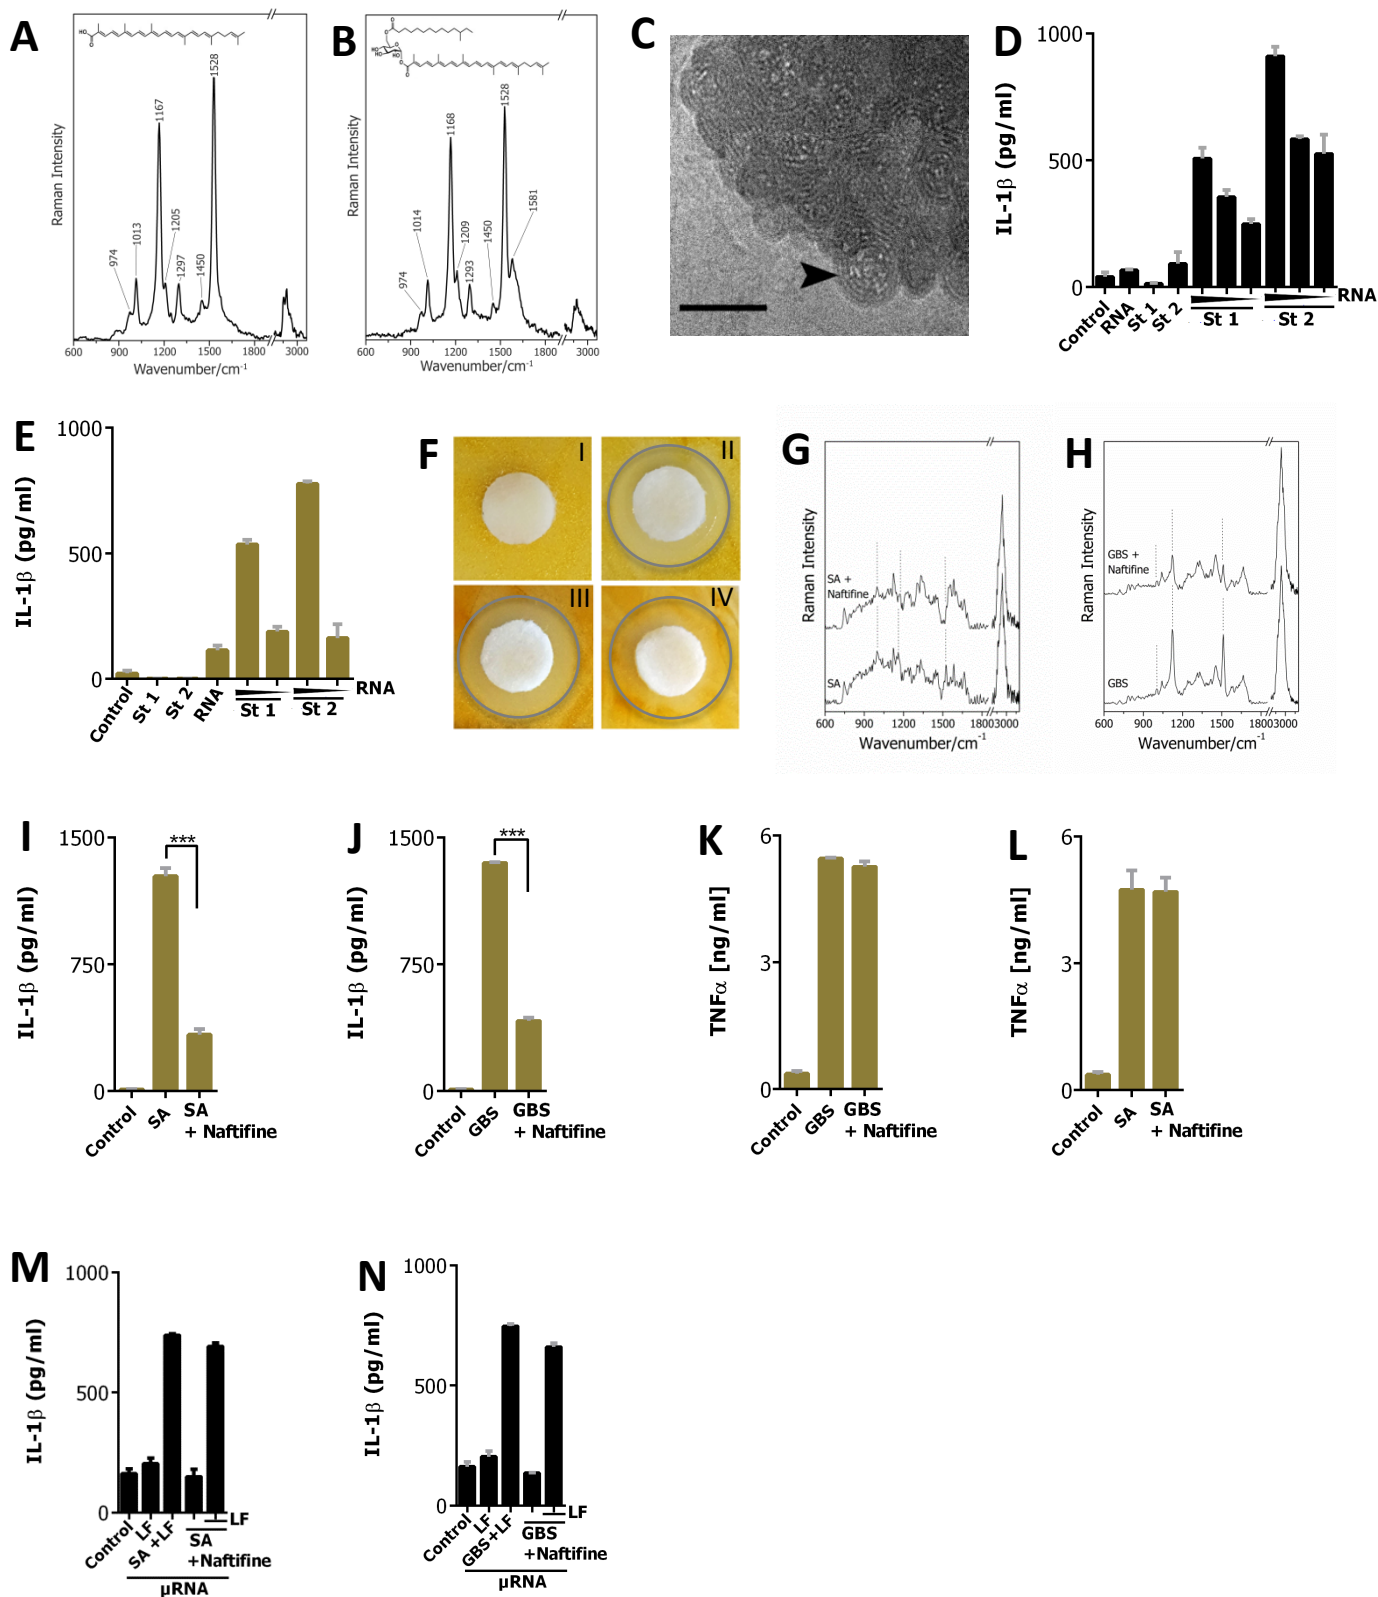

# Figure 7

**A** Bacterial patient isolates

| Origin of Bacteria |                              | RNAIII Detection | Origin of RNAIII Bacteria |                              |
|--------------------|------------------------------|------------------|---------------------------|------------------------------|
| Patient            | Origin                       | Result           | Patient                   | Origin                       |
| P1                 | Others                       | Positive         | P26                       | Central venous blood culture |
| P2                 | Central venous blood culture | Positive         | P27                       | Peripheral blood culture     |
| P3                 | Others                       | Positive         | P28                       | Others                       |
| P4                 | Peripheral blood culture     | Positive         | P29                       | Peripheral blood culture     |
| P5                 | Sepsis                       | Positive         | P30                       | Central venous blood culture |
| P6                 | Sepsis                       | Positive         | P31                       | Peripheral blood culture     |
| P7                 | Peripheral blood culture     | Positive         | P32                       | Peripheral blood culture     |
| P8                 | Peripheral blood culture     | Positive         | P33                       | Peripheral blood culture     |
| P9                 | Peripheral blood culture     | Positive         | P34                       | Peripheral blood culture     |
| P10                | Peripheral blood culture     | Positive         | P35                       | Peripheral blood culture     |
| P11                | Peripheral blood culture     | Positive         | P36                       | Peripheral blood culture     |
| P12                | Sepsis                       | Positive         | P37                       | Peripheral blood culture     |
| P13                | Central venous blood culture | Positive         | P38                       | Peripheral blood culture     |
| P14                | Central venous blood culture | Positive         | P39                       | Peripheral blood culture     |
| P15                | Peripheral blood culture     | Positive         | P40                       | Peripheral blood culture     |
| P16                | Peripheral blood culture     | Positive         | P41                       | Peripheral blood culture     |
| P17                | Peripheral blood culture     | Positive         | P42                       | Central venous blood culture |
| P18                | Peripheral blood culture     | Positive         | P43                       | Central venous blood culture |
| P19                | Peripheral blood culture     | Positive         | P44                       | Peripheral blood culture     |
| P20                | Peripheral blood culture     | Positive         | P45                       | Peripheral blood culture     |
| P21                | Peripheral blood culture     | Positive         | P46                       | Sepsis                       |
| P22                | Sepsis                       | Positive         | P47                       | Peripheral blood culture     |
| P23                | Peripheral blood culture     | Positive         | P48                       | Peripheral blood culture     |
| P24                | Peripheral blood culture     | Positive         | P49                       | Peripheral blood culture     |
| P25                | Peripheral blood culture     | Positive         | P50                       | Peripheral blood culture     |

Legend:  
 ■ RNAIII Positive (Green)  
 ■ RNAIII Negative (Olive)  
 ■ Peripheral blood culture (Red)  
 ■ Central venous blood culture (Orange)  
 ■ Others (Light Green)

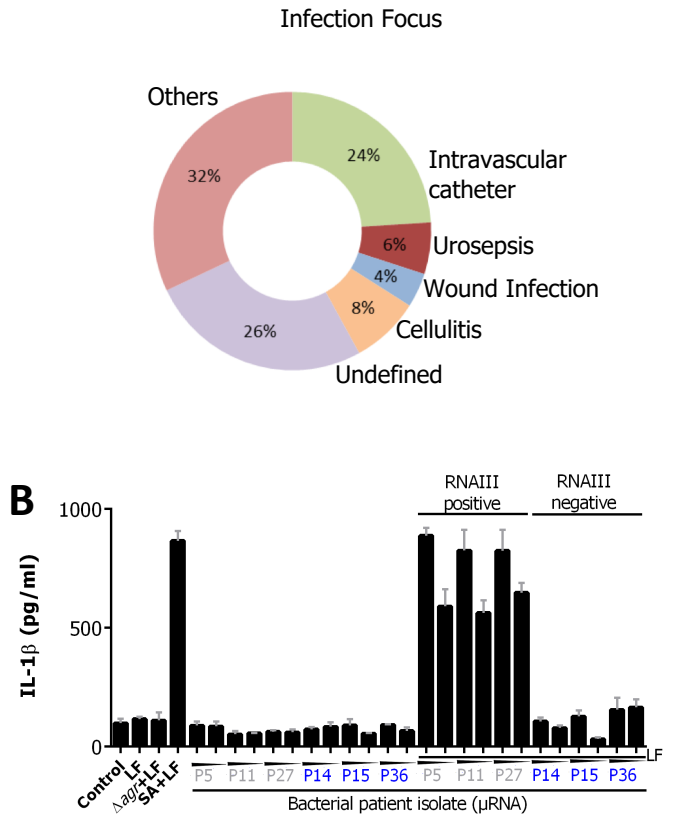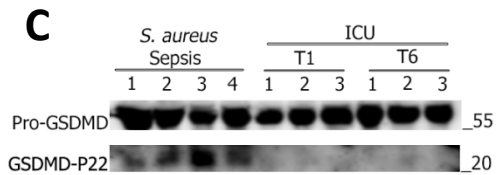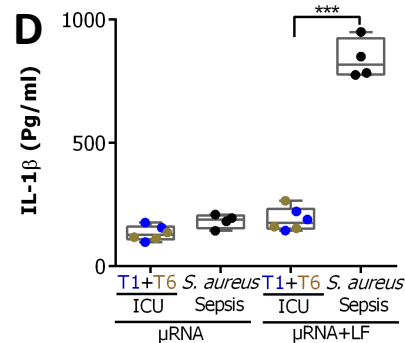

Source: https://www.biorxiv.org/content/10.1101/2021.07.21.453173v1.full.pdf
